# Supplementary material
Source: PubMed Central journal article supplement (PMC4415367)

**Supplementary Table 1:**

*Top gene-sets associated with COPD in COPDGene and GenKOLS.*

Full list of all 42 gene-sets that reached nominal significance in COPDGene and GenKOLS. Gene-sets are given together with their p-values for the two studies. METAINFO: GENE-SET – name of the gene-set, for a detailed description please see MsigDB, N\_all – number of genes in this gene list (MsigDB). COPDGene / GenKOLS / ECLIPSE: N\_in – number of successfully incorporated genes per gene-set, P – p-value for gene-set, Pcorr – results of analysis without known COPD genes in the gene-sets. Combined: P – p-value for gene-set after meta-analysis of COPDGene and GenKOLS study results, Pcorr – results of meta-analysis without known COPD genes in the gene-sets. Gene-sets highlighted in bold demonstrated a nominally significant p-value across all studied samples.

**Supplementary Table 2:**

*REACTOME PRESYNAPTIC NICOTINIC ACETYLCHOLINE RECEPTORS* pathway gene list and corresponding FORGE gene-based results in COPDGene and GENKOLS.

This pathway was the top pathway associated with COPD case-control status in both COPDGene and in GenKOLS. The FORGE gene-based results are displayed for both studies. METAINFO: GENE – HUGO gene name, CHR – chromosome, START – start position in base pairs from the start of the chromosome, STOP – stop position in base pairs from the start of the chromosome; COPDGene / GenKOLS / ECLIPSE: N – number of SNPs annotated to this gene for the respective study, Min P – p-value for the SNP with the lowest p-value (of all SNPs annotated to the gene), Gene P – gene-based p-value for this gene from FORGE analyses. Combined: Gene P – gene-based p-value for this gene from meta-analysis of COPDGene and GenKOLS single study p-values. Genes are highlighted in bold if they surpass the experiment-wide significance level ( $1E-06$ ) for the gene-based analyses or a SNP annotated to the gene ( $5E-08$ ) in the discovery population (COPDGene). Genes are highlighted in italics if they reached nominal significance for the gene-based discovery (COPDGene) and replication (GenKOLS) results. All p-values achieving nominal significance are shaded in grey.

**Supplementary Figure 1: a.** dmGWAS consensus module generated using the COPDGene results that replicated in GenKOLS. Node color is proportional to p-value significance where the lighter the node shading the smaller the p-value from the gene-based analysis in FORGE. **b.** dmGWAS analysis repeated excluding *UBC* using COPDGene results that replicated in GenKOLS.

**Supplementary Figure 2:** dmGWAS consensus networks that were generated when the FORGE p-values in COPDGene and GenKOLS were shuffled and run in dmGWAS 10 times.

## METAINFO

---

### GENE-SET

---

REACTOME\_PRESYNAPTIC\_NICOTINIC\_ACETYLCHOLINE\_RECEPTORS  
REACTOME\_ACETYLCHOLINE\_BINDING\_AND\_DOWNSTREAM\_EVENTS

REACTOME\_HIGHLY\_CALCIIUM\_PERMEABLE\_POSTSYNAPTIC\_NICOTINIC\_ACETYLCHOLINE\_RECEPTORS  
REACTOME\_TRANSMISSION\_ACROSS\_CHEMICAL\_SYNAPSES

HOOI\_ST7\_TARGETS\_UP

REACTOME\_NEUROTRANSMITTER\_RECEPTOR\_BINDING\_AND\_DOWNSTREAM\_TRANSMISSION\_IN\_  
THE\_POSTSYNAPTIC\_CELL

NICOTINIC\_ACETYLCHOLINE\_ACTIVATED\_CATION\_SELECTIVE\_CHANNEL\_ACTIVITY

NICOTINIC\_ACETYLCHOLINE\_GATED\_RECEPTOR\_CHANNEL\_COMPLEX

REACTOME\_SIGNALING\_BY\_FGFR1\_FUSION\_MUTANTS

REACTOME\_REGULATION\_OF\_SIGNALING\_BY\_CBL

GSE12366\_GC\_BCELL\_VS\_PLASMA\_CELL\_UP

NIKOLSKY\_BREAST\_CANCER\_15Q26\_AMPLICON

AMINE\_BINDING

GSE17721\_LPS\_VS\_CPG\_2H\_BMDM\_UP

V\$FOXO3\_01

SENESE\_HDAC2\_TARGETS\_UP

KEGG\_OLFACTORY\_TRANSDUCTION

SHETH\_LIVER\_CANCER\_VS\_TXNIP\_LOSS\_PAM1

VANOEVERLEN\_MYOGENESIS\_SIN3A\_TARGETS

KEGG\_FOCAL\_ADHESION

ACETYLCHOLINE\_BINDING

REACTOME\_NEURONAL\_SYSTEM

BIOCARTA\_GLEEVEC\_PATHWAY

CHIARADONNA\_NEOPLASTIC\_TRANSFORMATION\_KRAS\_CDC25\_DN

FARMER\_BREAST\_CANCER\_CLUSTER\_8

KEGG\_SYSTEMIC\_LUPUS\_ERYTHEMATOSUS

GSE2706\_LPS\_VS\_R848\_AND\_LPS\_2H\_STIM\_DC\_DN

KATSANOUELAVL1\_TARGETS\_UP

YAO\_TEMPORAL\_RESPONSE\_TO\_PROGESTERONE\_CLUSTER\_9

REACTOME\_APC\_C\_CDH1\_MEDIATED\_DEGRADATION\_OF\_CDC20\_AND\_OTHER\_APC\_C\_CDH1\_

TARGETED\_PROTEINS\_IN\_LATE\_MITOSIS\_EARLY\_G1

REACTOME\_DESTABILIZATION\_OF\_MRNA\_BY\_AUF1\_HNRNP\_D0

KANG\_AR\_TARGETS\_UP

**NIKOLSKY\_BREAST\_CANCER\_16Q24\_AMPLICON**

REACTOME\_SIGNALING\_BY\_HIPPO

GSE36476\_CTRL\_VS\_TSST\_ACT\_16H\_MEMORY\_CD4\_TCELL\_OLD\_DN

POTASSIUM\_CHANNEL\_REGULATOR\_ACTIVITY

GCCNNNWTAAR\_UNKNOWN

ZWANG\_EGF\_PERSISTENTLY\_UP

REACTOME\_CDT1\_ASSOCIATION\_WITH\_THE\_CDC6\_ORC\_ORIGIN\_COMPLEX

**V\$EGR1\_01**

MODY\_HIPPOCAMPUS\_POSTNATAL

GSE20366\_CD103\_POS\_VS\_CD103\_KLRG1\_DP\_TREG\_DN

---

| Discovery |           |           |              |              |           |           |               |               |               |               |
|-----------|-----------|-----------|--------------|--------------|-----------|-----------|---------------|---------------|---------------|---------------|
| N_all     | COPDGene  |           |              |              | GenKOLS   |           |               |               | Combined      |               |
|           | N         | Ncorr     | P            | Pcorr        | N         | Ncorr     | P             | Pcorr         | P             | Pcorr         |
| 12        | 12        | 9         | 3.2E-04      | 0.11         | 12        | 9         | 0.0066        | 0.12          | 2.8E-05       | 0.10          |
| 16        | 14        | 11        | 5.4E-04      | 0.11         | 14        | 11        | 0.0056        | 0.094         | 4.3E-05       | 0.088         |
| 13        | 11        | 8         | 0.0024       | 0.34         | 11        | 8         | 0.0055        | 0.12          | 2.1E-04       | 0.35          |
| 186       | 172       | 169       | 0.0029       | 0.015        | 172       | 169       | 0.0060        | 0.016         | 2.8E-04       | 0.0033        |
| 94        | 80        | 80        | 0.0050       | 0.0050       | 80        | 80        | 0.031         | 0.031         | 0.0016        | 0.0016        |
| 137       | 126       | 123       | 0.0053       | 0.032        | 126       | 123       | 0.016         | 0.043         | 0.0010        | 0.014         |
| 11        | 11        | 9         | 0.0083       | 0.268        | 11        | 9         | 0.016         | 0.11          | 0.0017        | 0.26          |
| 11        | 11        | 9         | 0.0083       | 0.268        | 11        | 9         | 0.016         | 0.11          | 0.0017        | 0.26          |
| 19        | 18        | 18        | 0.011        | 0.011        | 18        | 18        | 0.006         | 0.0059        | 0.0013        | 0.0013        |
| 18        | 18        | 18        | 0.012        | 0.012        | 18        | 18        | 0.035         | 0.035         | 0.0043        | 0.0043        |
| 200       | 177       | 177       | 0.013        | 0.013        | 177       | 177       | 0.0054        | 0.0054        | 0.0014        | 0.0014        |
| 22        | 21        | 21        | 0.014        | 0.014        | 21        | 21        | 0.0085        | 0.0085        | 0.0020        | 0.0020        |
| 23        | 21        | 18        | 0.015        | 0.340        | 21        | 18        | 0.027         | 0.19          | 0.0046        | 0.43          |
| 200       | 188       | 188       | 0.016        | 0.016        | 187       | 187       | 0.030         | 0.030         | 0.0052        | 0.0052        |
| 245       | 226       | 226       | 0.017        | 0.017        | 226       | 226       | 0.030         | 0.030         | 0.0054        | 0.0054        |
| 114       | 110       | 110       | 0.017        | 0.017        | 110       | 110       | 0.0040        | 0.0040        | 0.0016        | 0.0016        |
| 389       | 356       | 356       | 0.018        | 0.018        | 357       | 357       | 0.043         | 0.043         | 0.0078        | 0.0078        |
| 229       | 213       | 213       | 0.019        | 0.019        | 213       | 213       | 0.012         | 0.012         | 0.0035        | 0.0035        |
| 220       | 211       | 211       | 0.020        | 0.020        | 211       | 211       | 0.0075        | 0.0075        | 0.0028        | 0.0028        |
| 201       | 191       | 191       | 0.025        | 0.025        | 191       | 191       | 0.013         | 0.013         | 0.0052        | 0.0052        |
| 17        | 17        | 14        | 0.026        | 0.52         | 17        | 14        | 0.0086        | 0.104         | 0.0042        | 0.56          |
| 279       | 262       | 259       | 0.027        | 0.074        | 262       | 259       | 0.045         | 0.082         | 0.012         | 0.052         |
| 23        | 23        | 23        | 0.030        | 0.030        | 23        | 23        | 0.035         | 0.035         | 0.011         | 0.011         |
| 51        | 47        | 47        | 0.030        | 0.030        | 47        | 47        | 0.0085        | 0.0085        | 0.0050        | 0.0050        |
| 7         | 7         | 7         | 0.033        | 0.033        | 7         | 7         | 0.023         | 0.023         | 0.010         | 0.0099        |
| 140       | 121       | 121       | 0.034        | 0.034        | 122       | 122       | 0.050         | 0.050         | 0.016         | 0.016         |
| 200       | 137       | 136       | 0.034        | 0.058        | 137       | 136       | 0.0022        | 0.0032        | 0.003         | 0.0069        |
| 169       | 160       | 160       | 0.035        | 0.035        | 160       | 160       | 0.026         | 0.026         | 0.011         | 0.011         |
| 76        | 71        | 71        | 0.037        | 0.037        | 71        | 71        | 0.033         | 0.033         | 0.014         | 0.014         |
| 72        | 62        | 62        | 0.037        | 0.037        | 62        | 62        | 0.041         | 0.041         | 0.016         | 0.016         |
| 53        | 49        | 49        | 0.038        | 0.038        | 49        | 49        | 0.041         | 0.041         | 0.017         | 0.017         |
| 17        | 15        | 15        | 0.039        | 0.039        | 15        | 15        | 0.0030        | 0.0030        | 0.0039        | 0.0039        |
| <b>53</b> | <b>50</b> | <b>50</b> | <b>0.040</b> | <b>0.040</b> | <b>50</b> | <b>50</b> | <b>0.0092</b> | <b>0.0092</b> | <b>0.0073</b> | <b>0.0073</b> |
| 22        | 19        | 19        | 0.041        | 0.041        | 19        | 19        | 0.0071        | 0.0071        | 0.0065        | 0.0065        |
| 200       | 192       | 192       | 0.041        | 0.041        | 192       | 192       | 0.029         | 0.029         | 0.014         | 0.014         |

|            |            |            |              |              |            |            |               |               |               |               |
|------------|------------|------------|--------------|--------------|------------|------------|---------------|---------------|---------------|---------------|
| 14         | 13         | 13         | 0.042        | 0.042        | 13         | 13         | 0.0025        | 0.0025        | 0.0040        | 0.0040        |
| 149        | 134        | 134        | 0.042        | 0.042        | 134        | 134        | 0.028         | 0.028         | 0.015         | 0.015         |
| 32         | 29         | 29         | 0.045        | 0.045        | 29         | 29         | 0.0071        | 0.0071        | 0.0075        | 0.0075        |
| 56         | 53         | 53         | 0.046        | 0.046        | 53         | 53         | 0.047         | 0.047         | 0.022         | 0.022         |
| <b>269</b> | <b>251</b> | <b>251</b> | <b>0.047</b> | <b>0.047</b> | <b>251</b> | <b>251</b> | <b>0.0034</b> | <b>0.0034</b> | <b>0.0054</b> | <b>0.0053</b> |
| 63         | 58         | 58         | 0.049        | 0.049        | 58         | 58         | 0.046         | 0.046         | 0.023         | 0.023         |
| 200        | 187        | 187        | 0.049        | 0.048        | 187        | 187        | 0.045         | 0.045         | 0.023         | 0.022         |

---

**Replication**  
**ECLIPSE**

| <b>N</b>  | <b>Ncorr</b> | <b>P</b>      | <b>Pcorr</b>  |
|-----------|--------------|---------------|---------------|
| 12        | 9            | 0.87          | 0.96          |
| 14        | 11           | 0.84          | 0.94          |
| 11        | 8            | 0.75          | 0.90          |
| 172       | 169          | 0.46          | 0.50          |
| 80        | 80           | 0.79          | 0.79          |
| 126       | 123          | 0.68          | 0.73          |
| 11        | 9            | 0.92          | 0.96          |
| 11        | 9            | 0.92          | 0.96          |
| 18        | 18           | 0.69          | 0.69          |
| 18        | 18           | 0.15          | 0.15          |
| 177       | 177          | 0.94          | 0.94          |
| 21        | 21           | 0.076         | 0.076         |
| 21        | 18           | 0.44          | 0.57          |
| 188       | 188          | 0.52          | 0.52          |
| 226       | 226          | 0.032         | 0.031         |
| 110       | 110          | 0.26          | 0.26          |
| 359       | 359          | 0.83          | 0.82          |
| 213       | 213          | 0.43          | 0.43          |
| 212       | 212          | 0.54          | 0.54          |
| 191       | 191          | 0.15          | 0.15          |
| 17        | 14           | 0.62          | 0.76          |
| 262       | 259          | 0.93          | 0.94          |
| 23        | 23           | 0.31          | 0.31          |
| 47        | 47           | 0.59          | 0.59          |
| 7         | 7            | 0.22          | 0.22          |
| 122       | 122          | 0.70          | 0.69          |
| 137       | 136          | 0.39          | 0.39          |
| 160       | 160          | 0.69          | 0.69          |
| 71        | 71           | 0.22          | 0.22          |
| 62        | 62           | 0.43          | 0.43          |
| 49        | 49           | 0.39          | 0.39          |
| 15        | 15           | 0.14          | 0.14          |
| <b>50</b> | <b>50</b>    | <b>0.0062</b> | <b>0.0062</b> |
| 19        | 19           | 0.95          | 0.95          |
| 192       | 192          | 0.30          | 0.30          |

|            |            |              |              |
|------------|------------|--------------|--------------|
| 13         | 13         | 0.92         | 0.92         |
| 134        | 134        | 0.17         | 0.16         |
| 29         | 29         | 0.88         | 0.88         |
| 53         | 53         | 0.32         | 0.32         |
| <b>251</b> | <b>251</b> | <b>0.022</b> | <b>0.021</b> |
| 58         | 58         | 0.29         | 0.28         |
| 187        | 187        | 0.90         | 0.90         |

---

## METAINFO

## COPDGene

| GENE          | CHR       | START           | STOP            | N         | Min P          | Gene P         | N         |
|---------------|-----------|-----------------|-----------------|-----------|----------------|----------------|-----------|
| CHRNA1        | 2         | 175612320       | 175629200       | 37        | 0.17           | 0.50           | 36        |
| CHRNA2        | 8         | 27317279        | 27337400        | 71        | 0.042          | 0.84           | 71        |
| <b>CHRNA3</b> | <b>15</b> | <b>78885394</b> | <b>78913637</b> | <b>54</b> | <b>1.3E-08</b> | <b>1.7E-05</b> | <b>54</b> |
| CHRNA4        | 20        | 61975420        | 62009753        | 36        | 0.048          | 0.80           | 35        |
| <b>CHRNA5</b> | <b>15</b> | <b>78857862</b> | <b>78887611</b> | <b>44</b> | <b>4.7E-08</b> | <b>0.0011</b>  | <b>44</b> |
| CHRNA2        | 1         | 154540257       | 154552502       | 22        | 0.15           | 0.41           | 22        |
| CHRNA3        | 8         | 42552519        | 42592550        | 37        | 0.012          | 0.18           | 38        |
| <b>CHRNA4</b> | <b>15</b> | <b>78916461</b> | <b>79012628</b> | <b>81</b> | <b>1.3E-08</b> | <b>1.0E-06</b> | <b>82</b> |
| CHRND         | 2         | 233390703       | 233401377       | 25        | 0.018          | 0.16           | 25        |
| CHRNE         | 17        | 4801069         | 4806369         | 19        | 0.012          | 0.067          | 19        |
| CHRNG         | 2         | 233404437       | 233412546       | 29        | 0.013          | 0.063          | 29        |
| CHRNA6        | 8         | 42607763        | 42651535        | 28        | 0.022          | 0.085          | 30        |



| y |                |               |                | Replication |       |        |
|---|----------------|---------------|----------------|-------------|-------|--------|
|   | GenKOLS        |               | Combined       | ECLIPSE     |       |        |
|   | Min P          | Gene P        | Gene P         | N           | Min P | Gene P |
|   | 0.10           | 0.50          | 0.99           | 39          | 0.075 | 0.16   |
|   | 3.4E-04        | 0.33          | 0.51           | 75          | 0.010 | 0.86   |
|   | <b>3.8E-04</b> | <b>0.0027</b> | <b>6.5E-07</b> | 60          | 0.059 | 0.17   |
|   | 0.073          | 0.74          | 0.29           | 36          | 0.068 | 0.70   |
|   | <b>2.6E-04</b> | <b>0.0093</b> | <b>1.3E-04</b> | 52          | 0.059 | 0.25   |
|   | 0.078          | 0.23          | 0.58           | 23          | 0.093 | 0.79   |
|   | 0.052          | 0.079         | 0.14           | 39          | 0.17  | 0.57   |
|   | <b>7.1E-04</b> | <b>0.0080</b> | <b>1.0E-07</b> | 86          | 0.16  | 0.52   |
|   | 0.078          | 0.21          | 0.21           | 27          | 0.12  | 0.96   |
|   | 0.030          | 0.50          | 0.19           | 20          | 0.17  | 0.89   |
|   | 0.078          | 0.33          | 0.12           | 33          | 0.11  | 0.43   |
|   | 0.038          | 0.15          | 0.089          | 32          | 0.077 | 1      |

**A**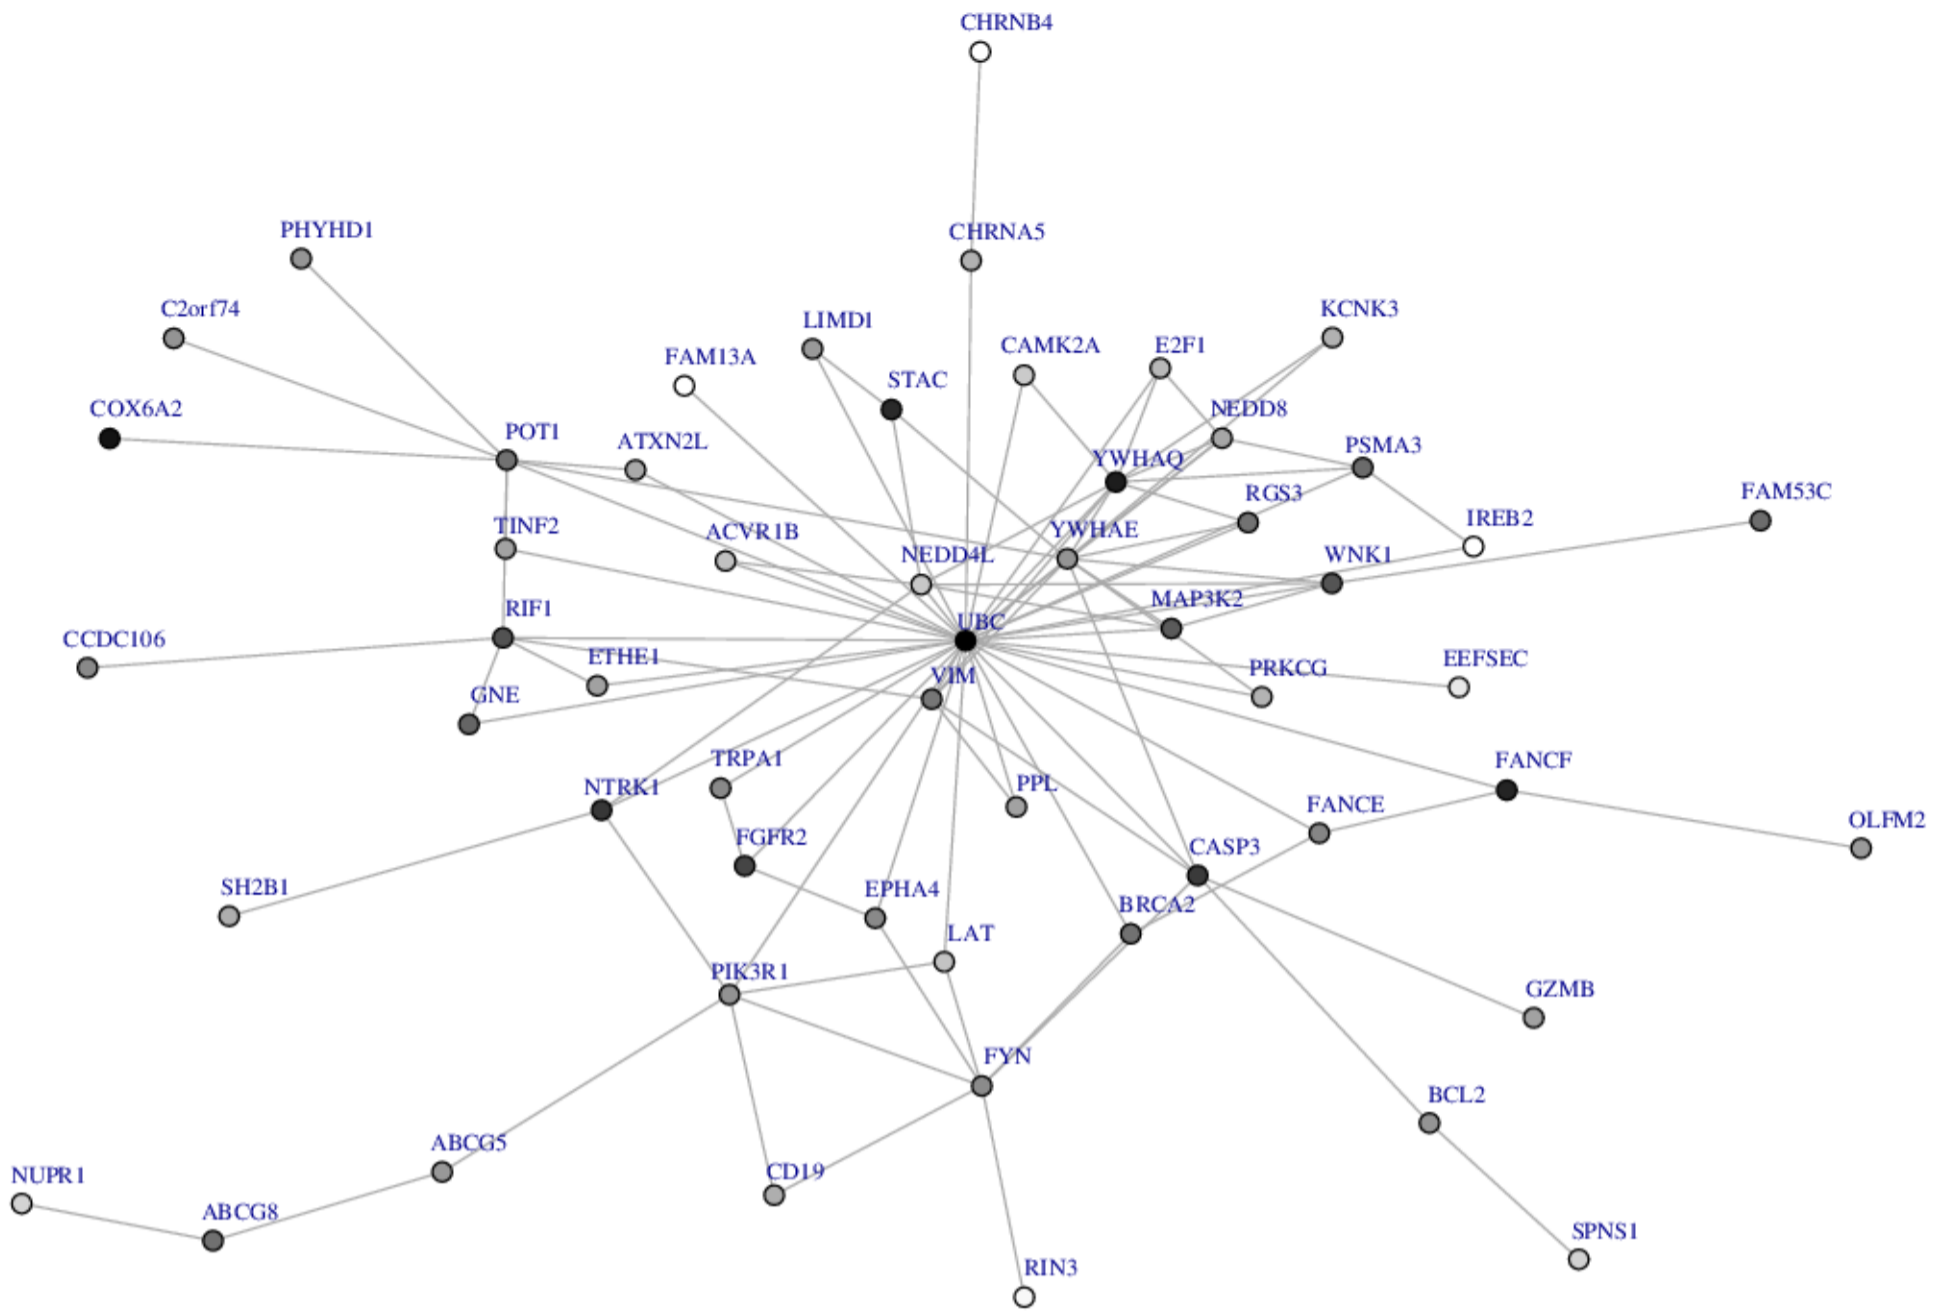**B**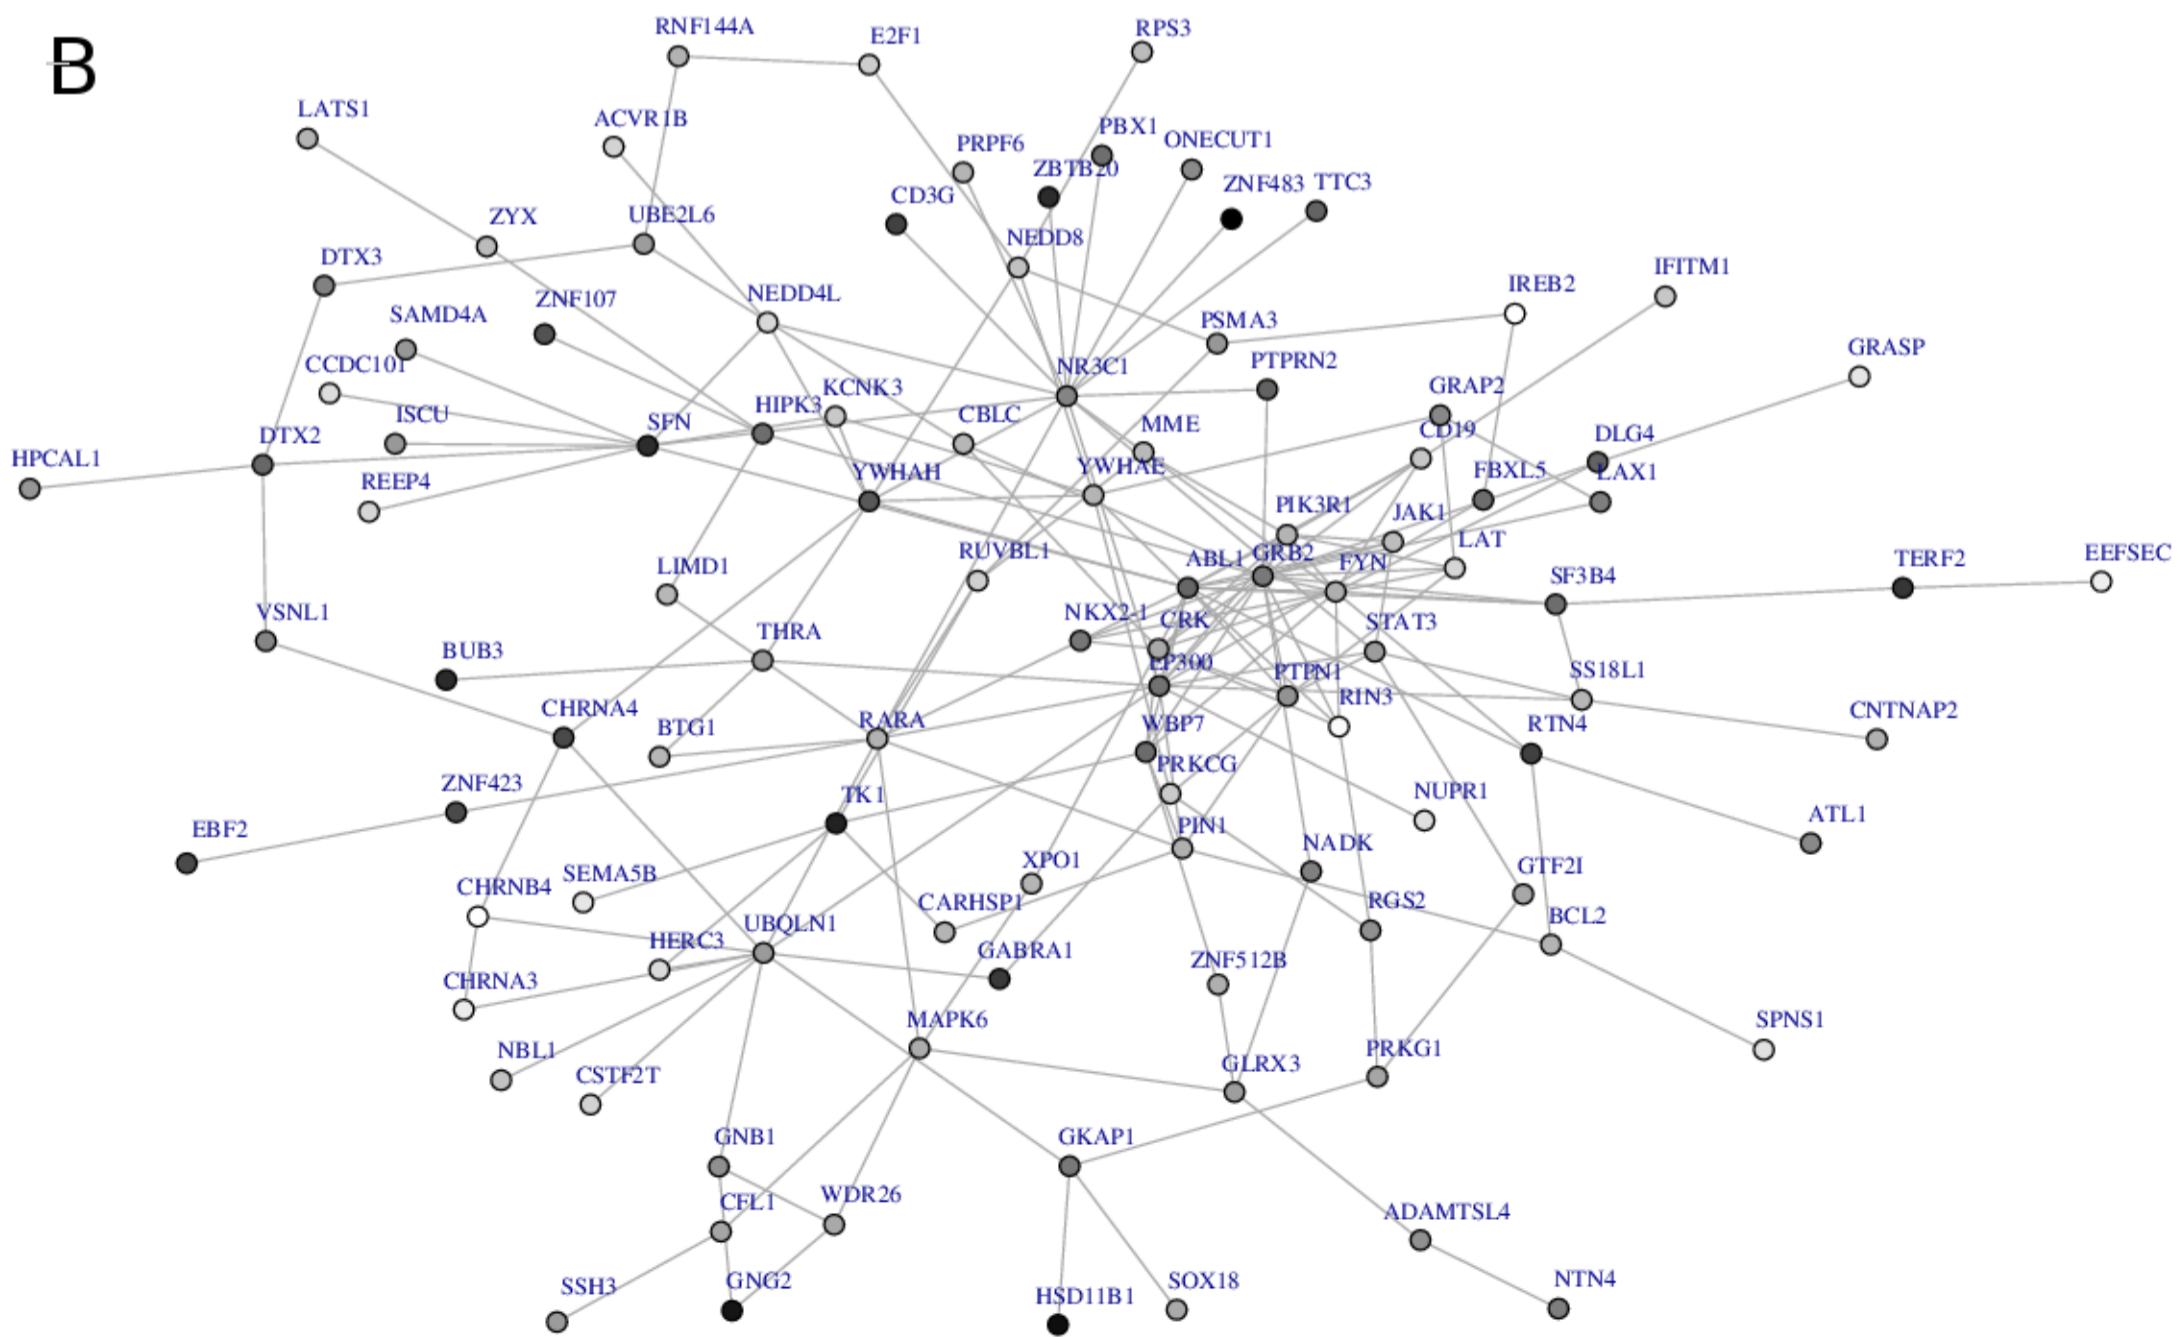

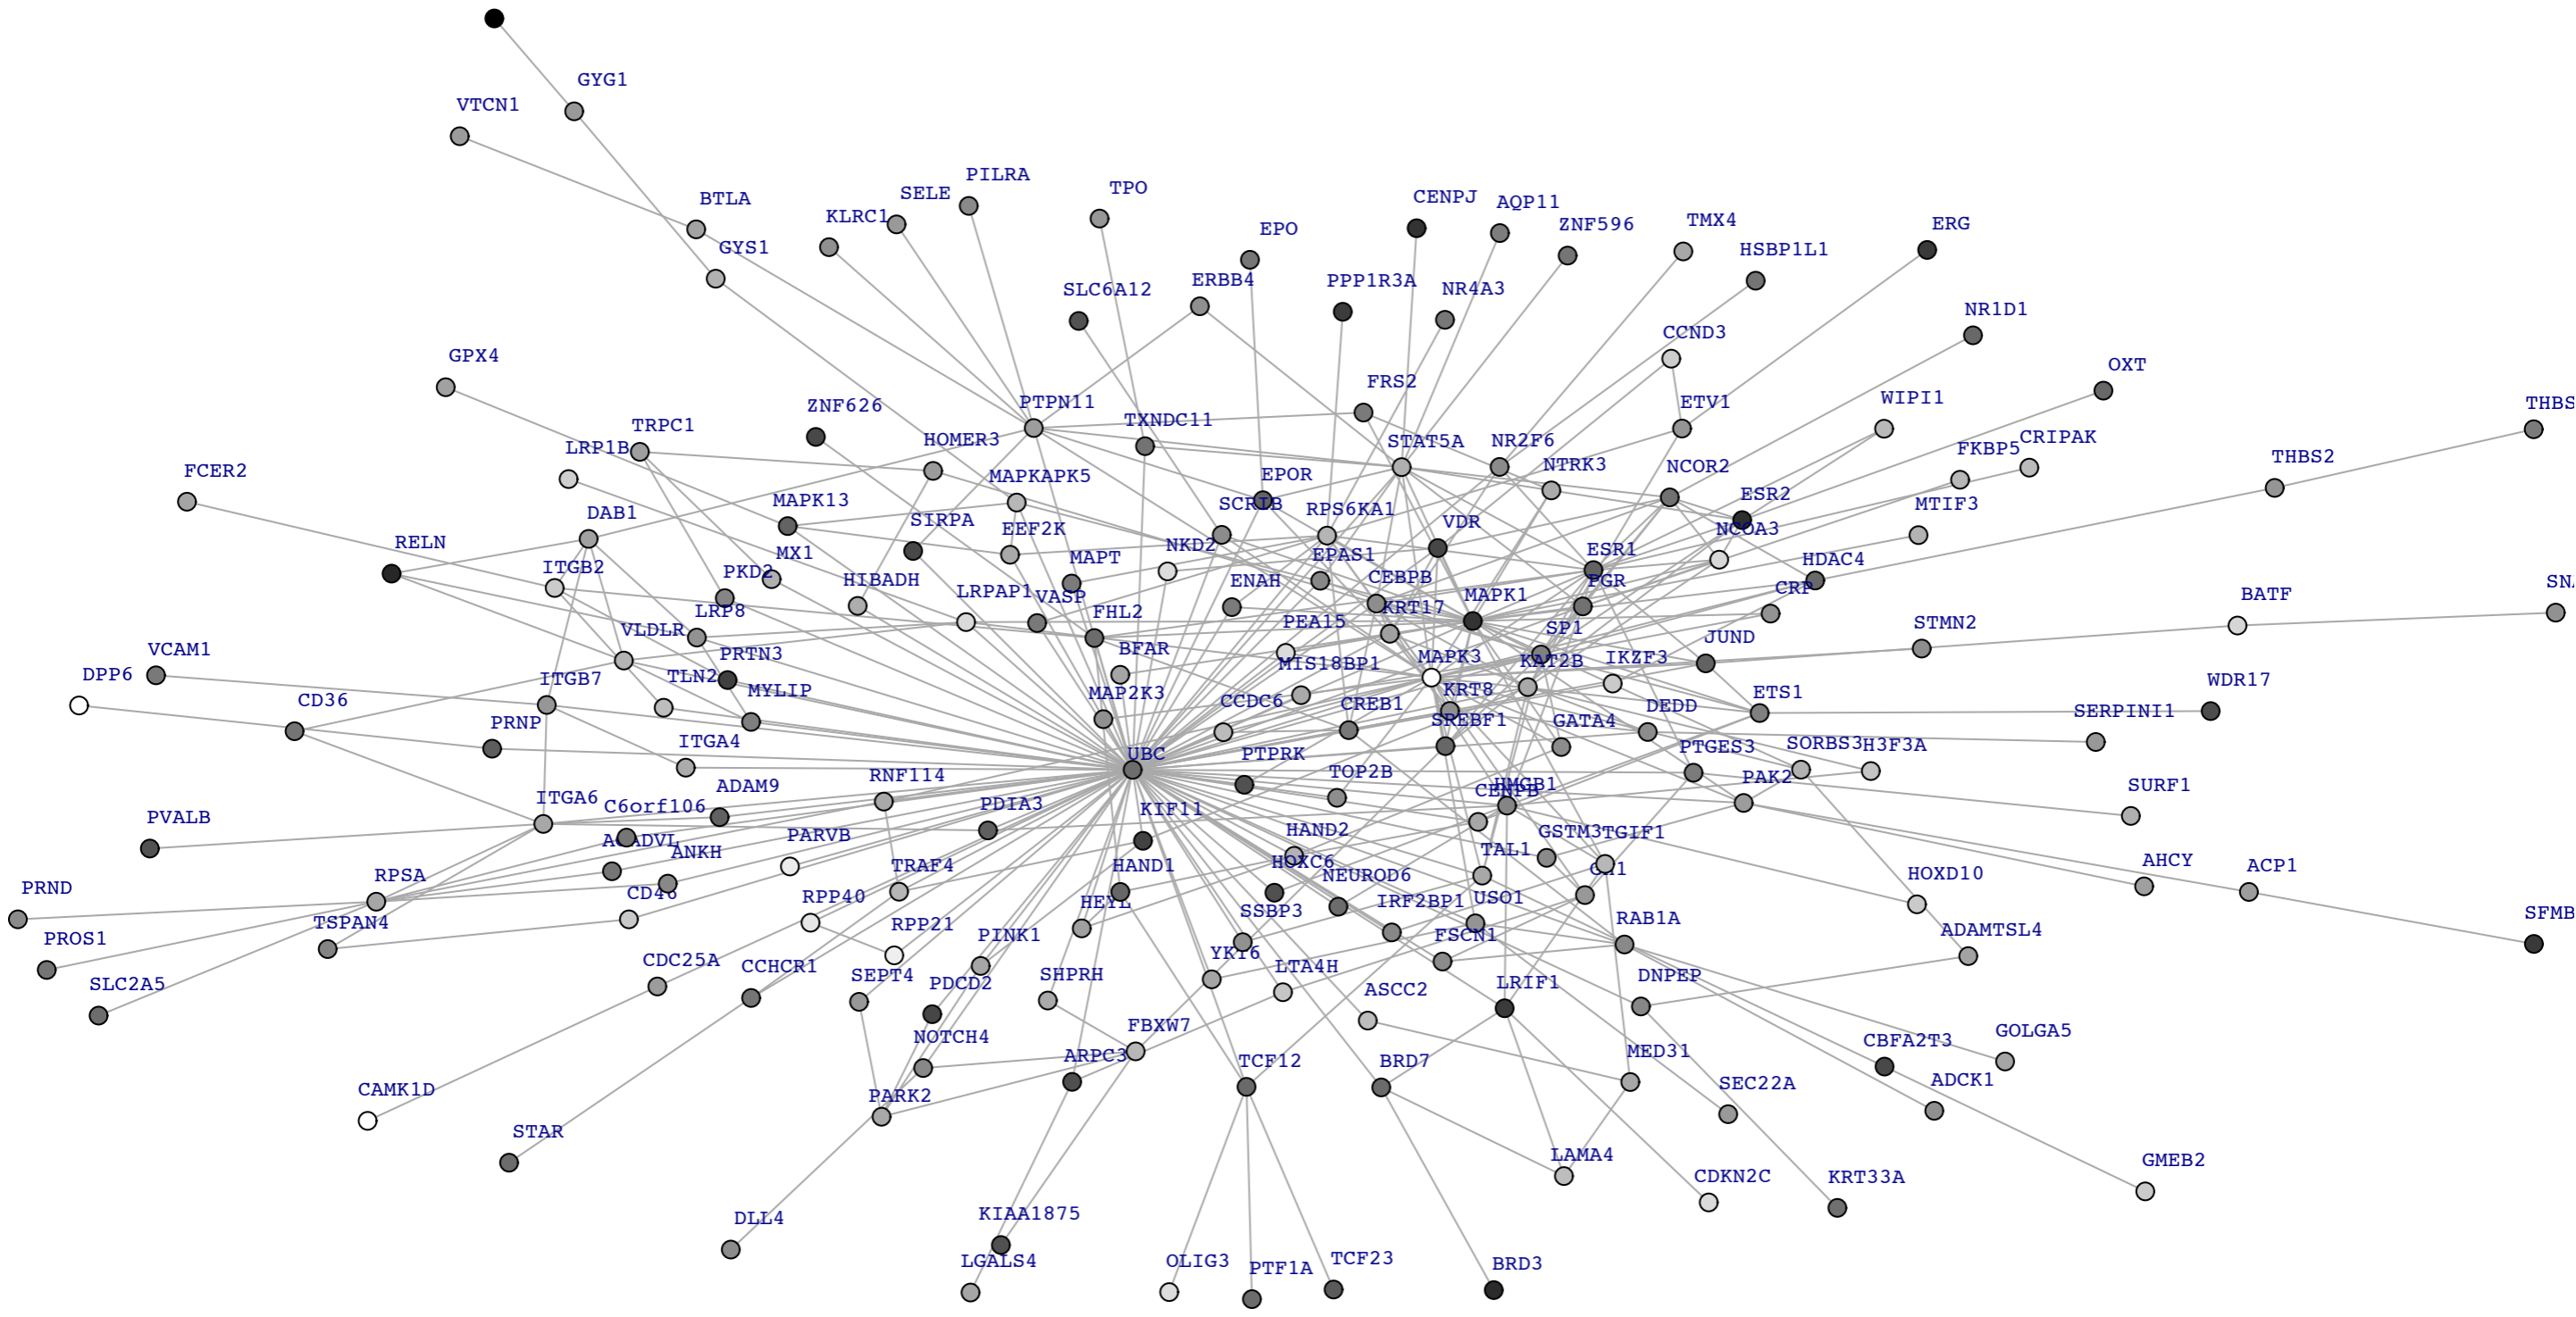



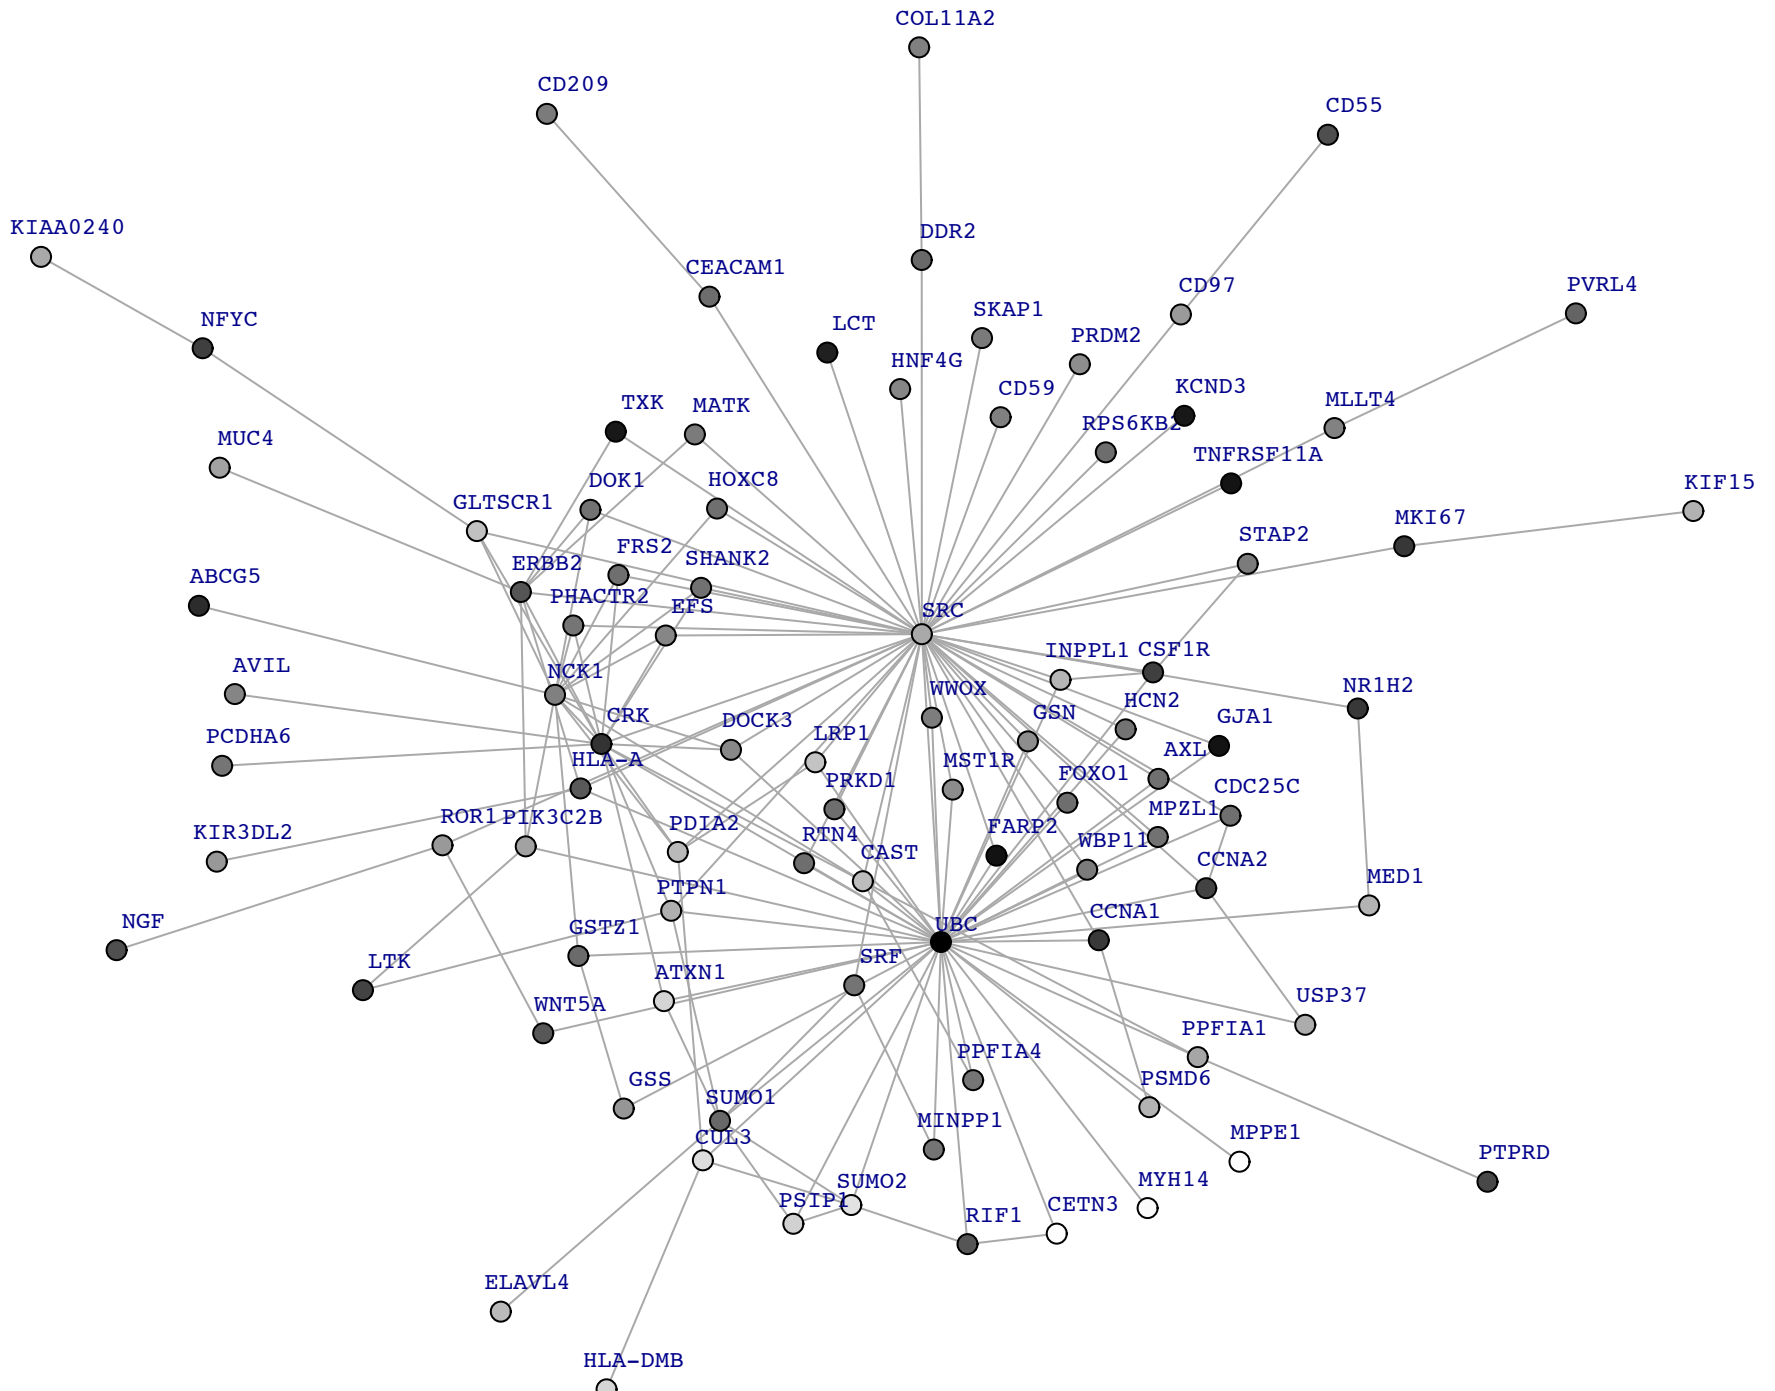





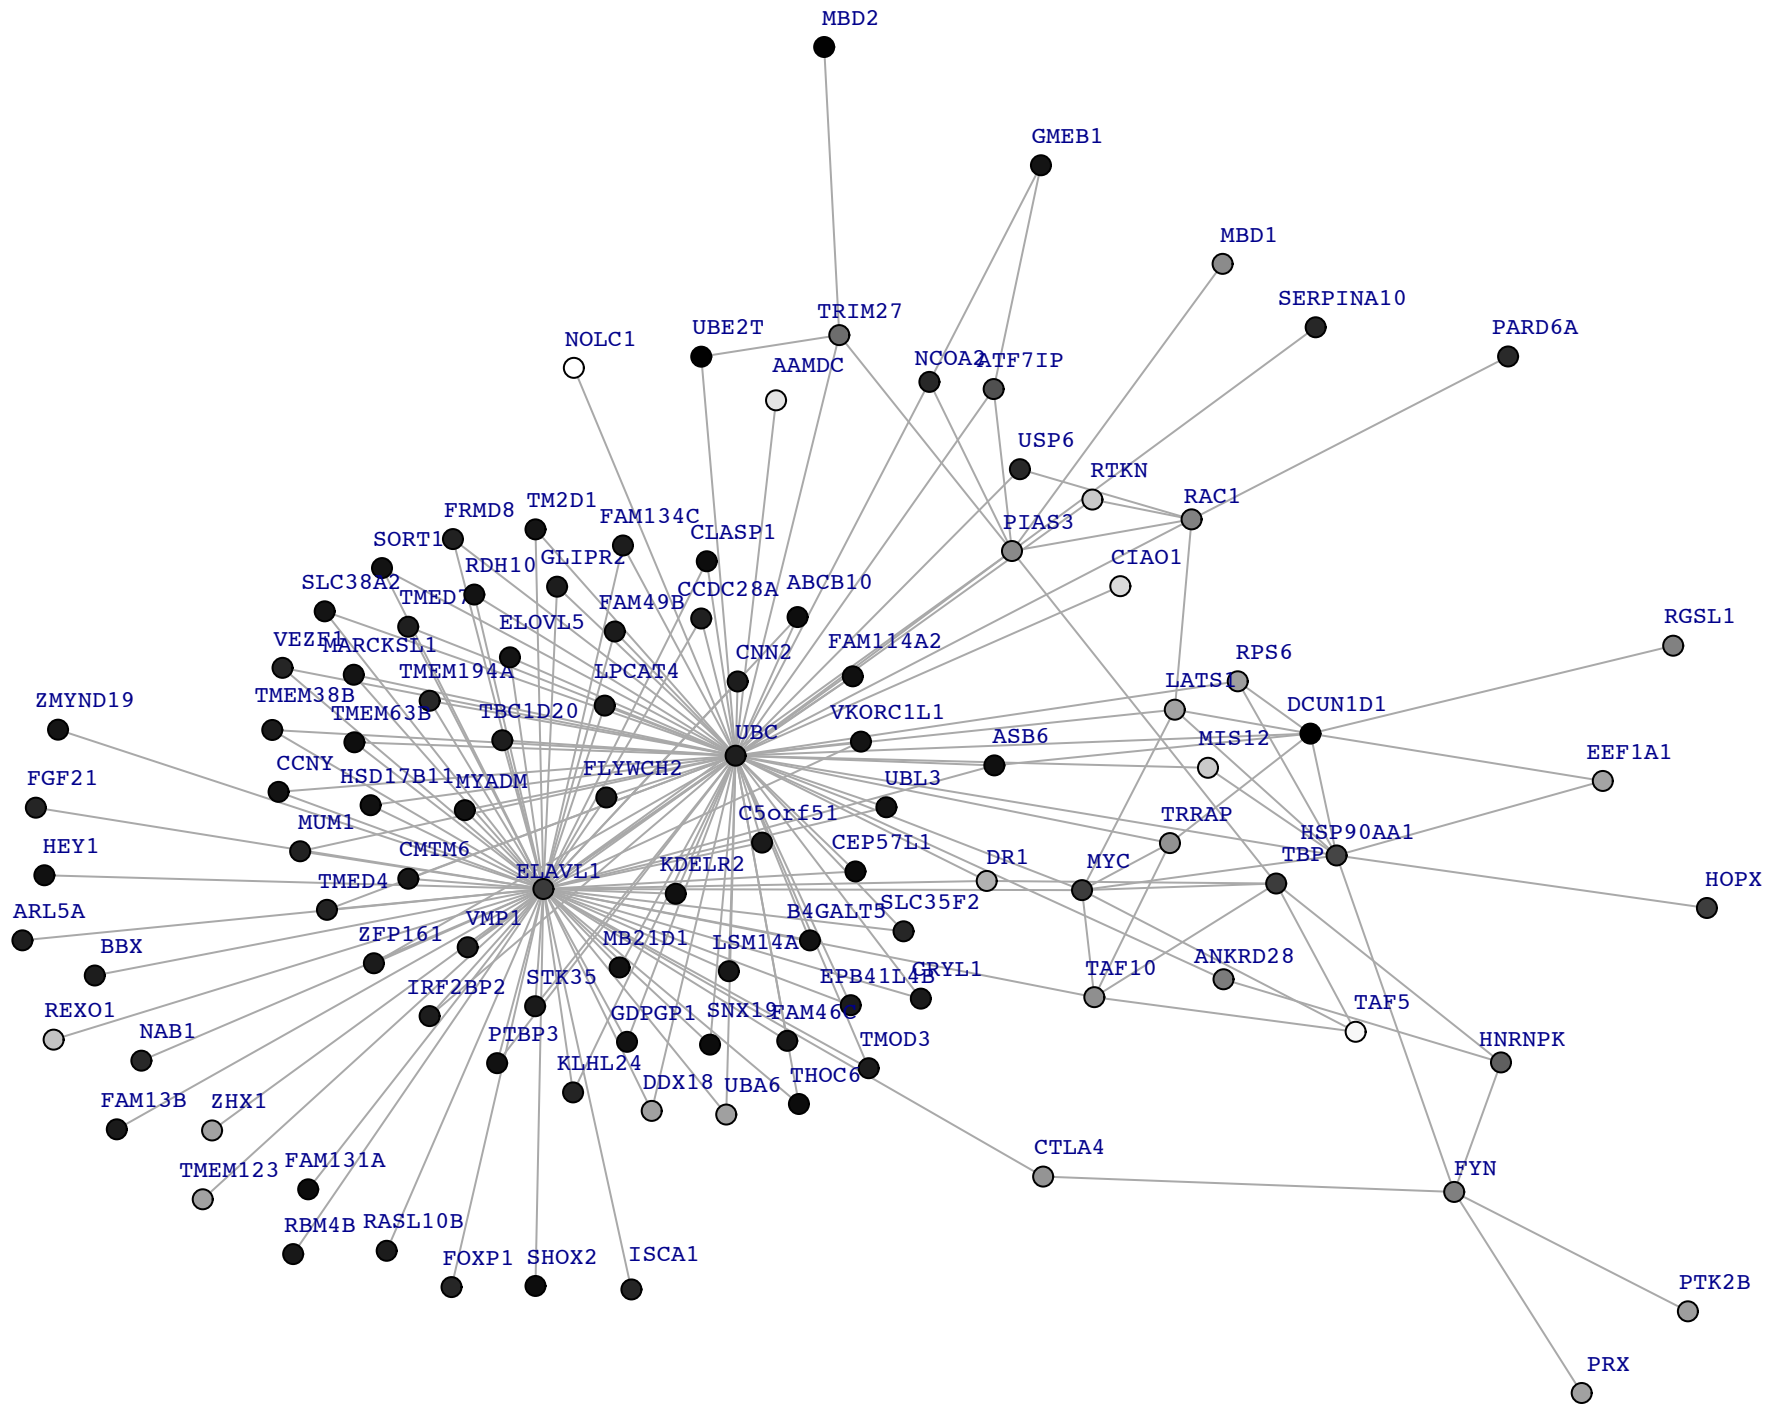



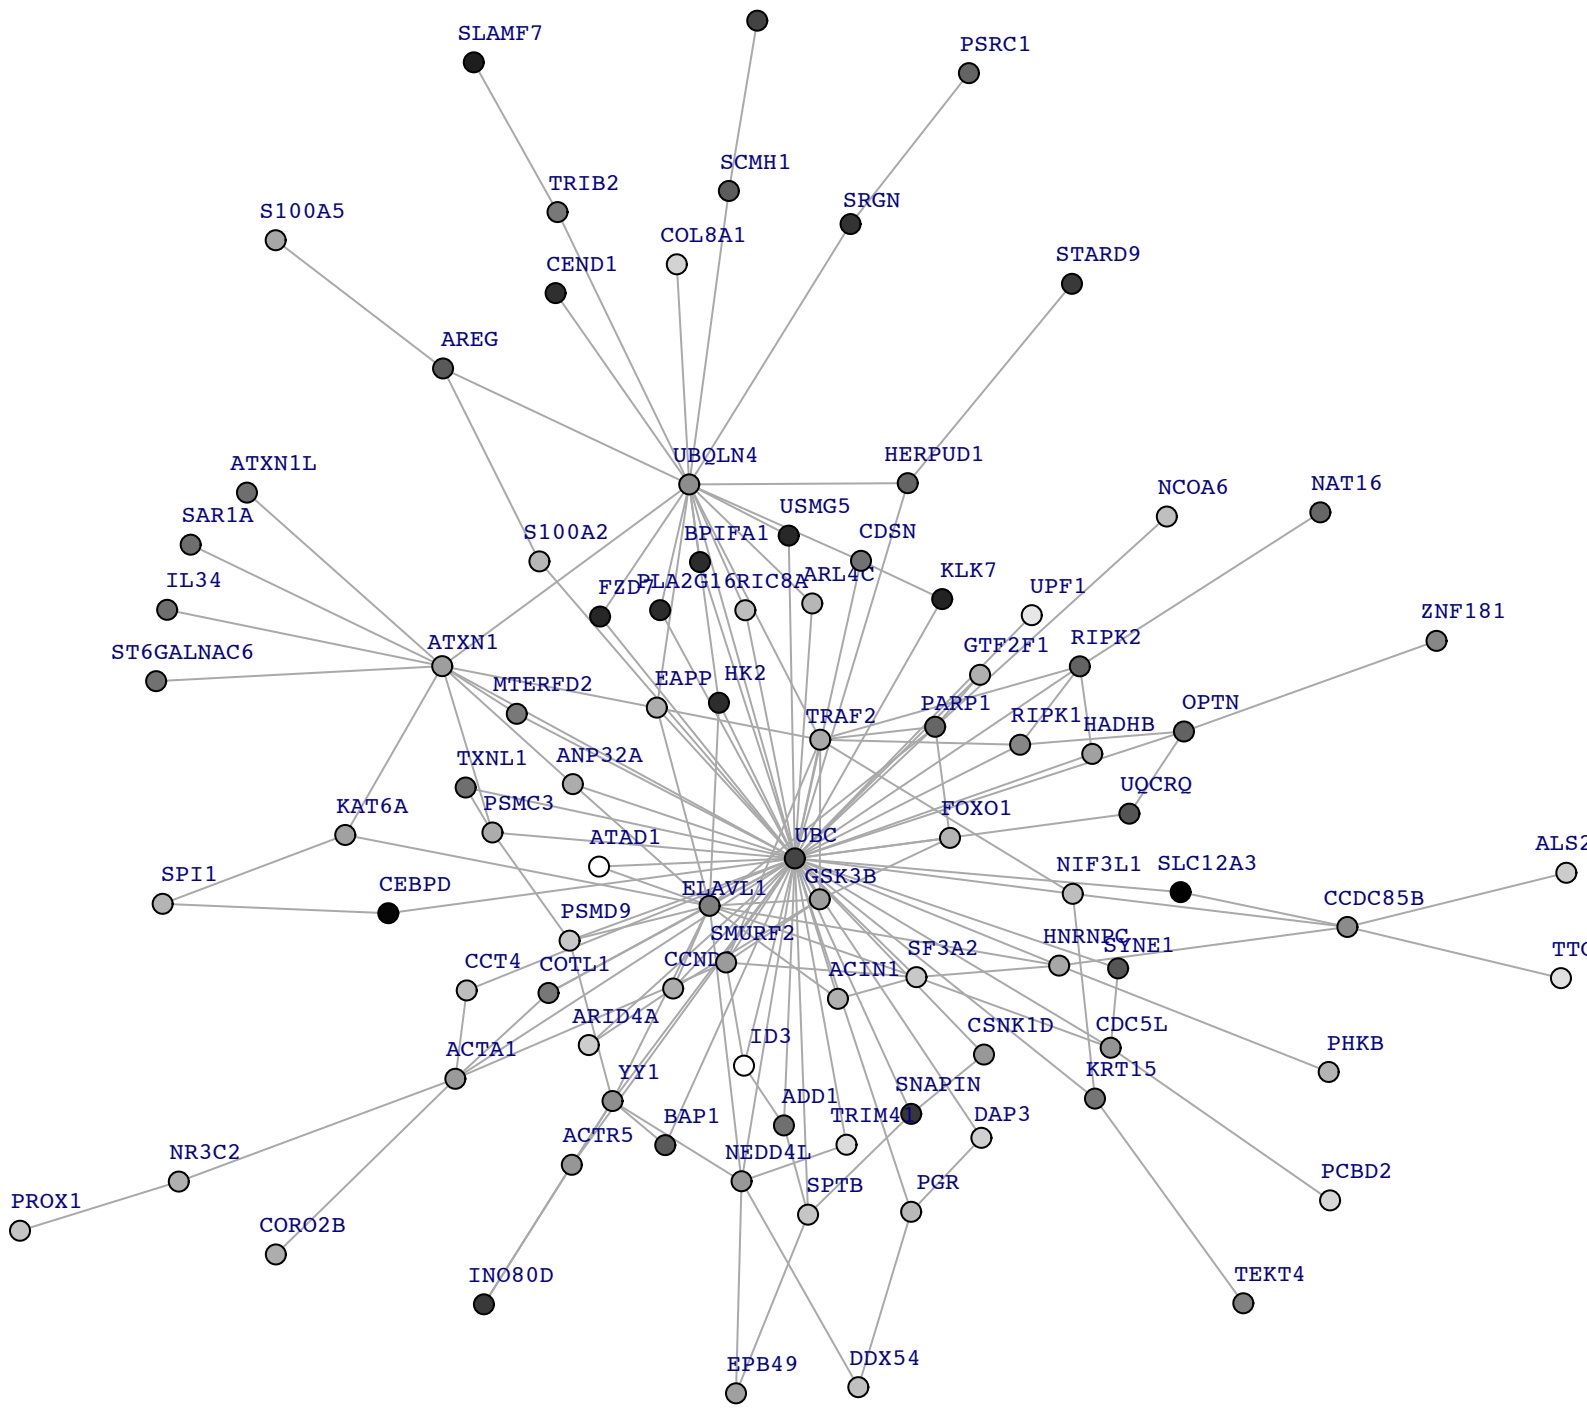

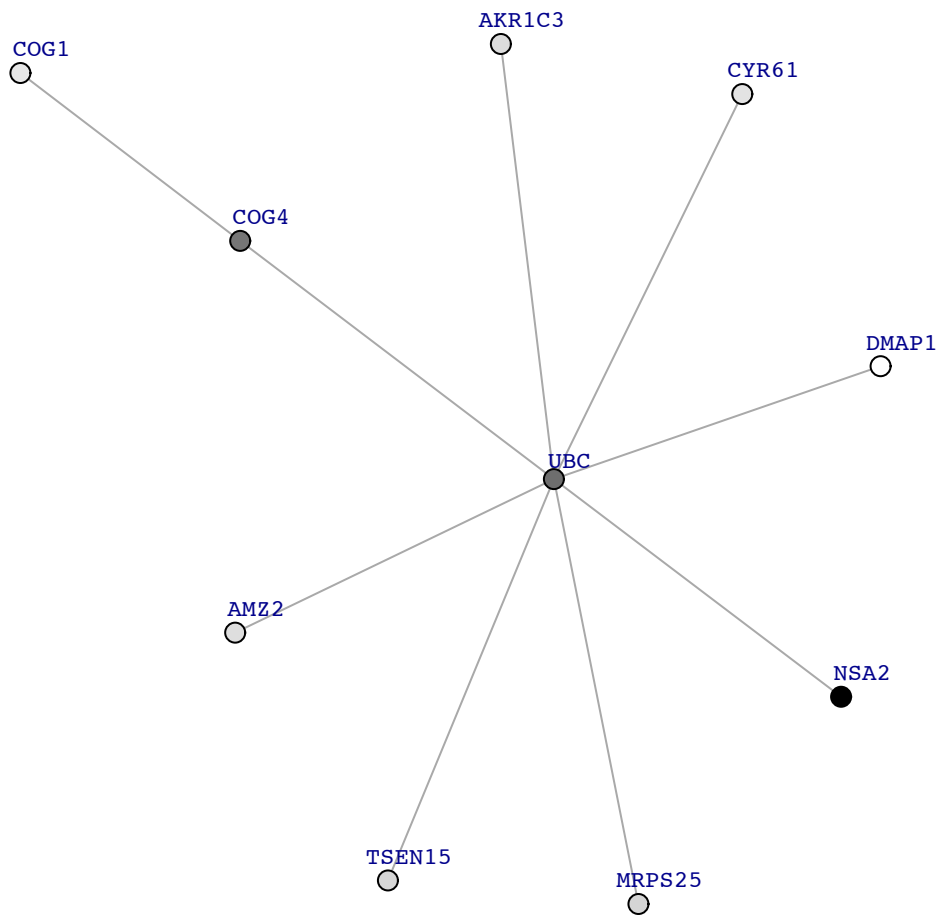

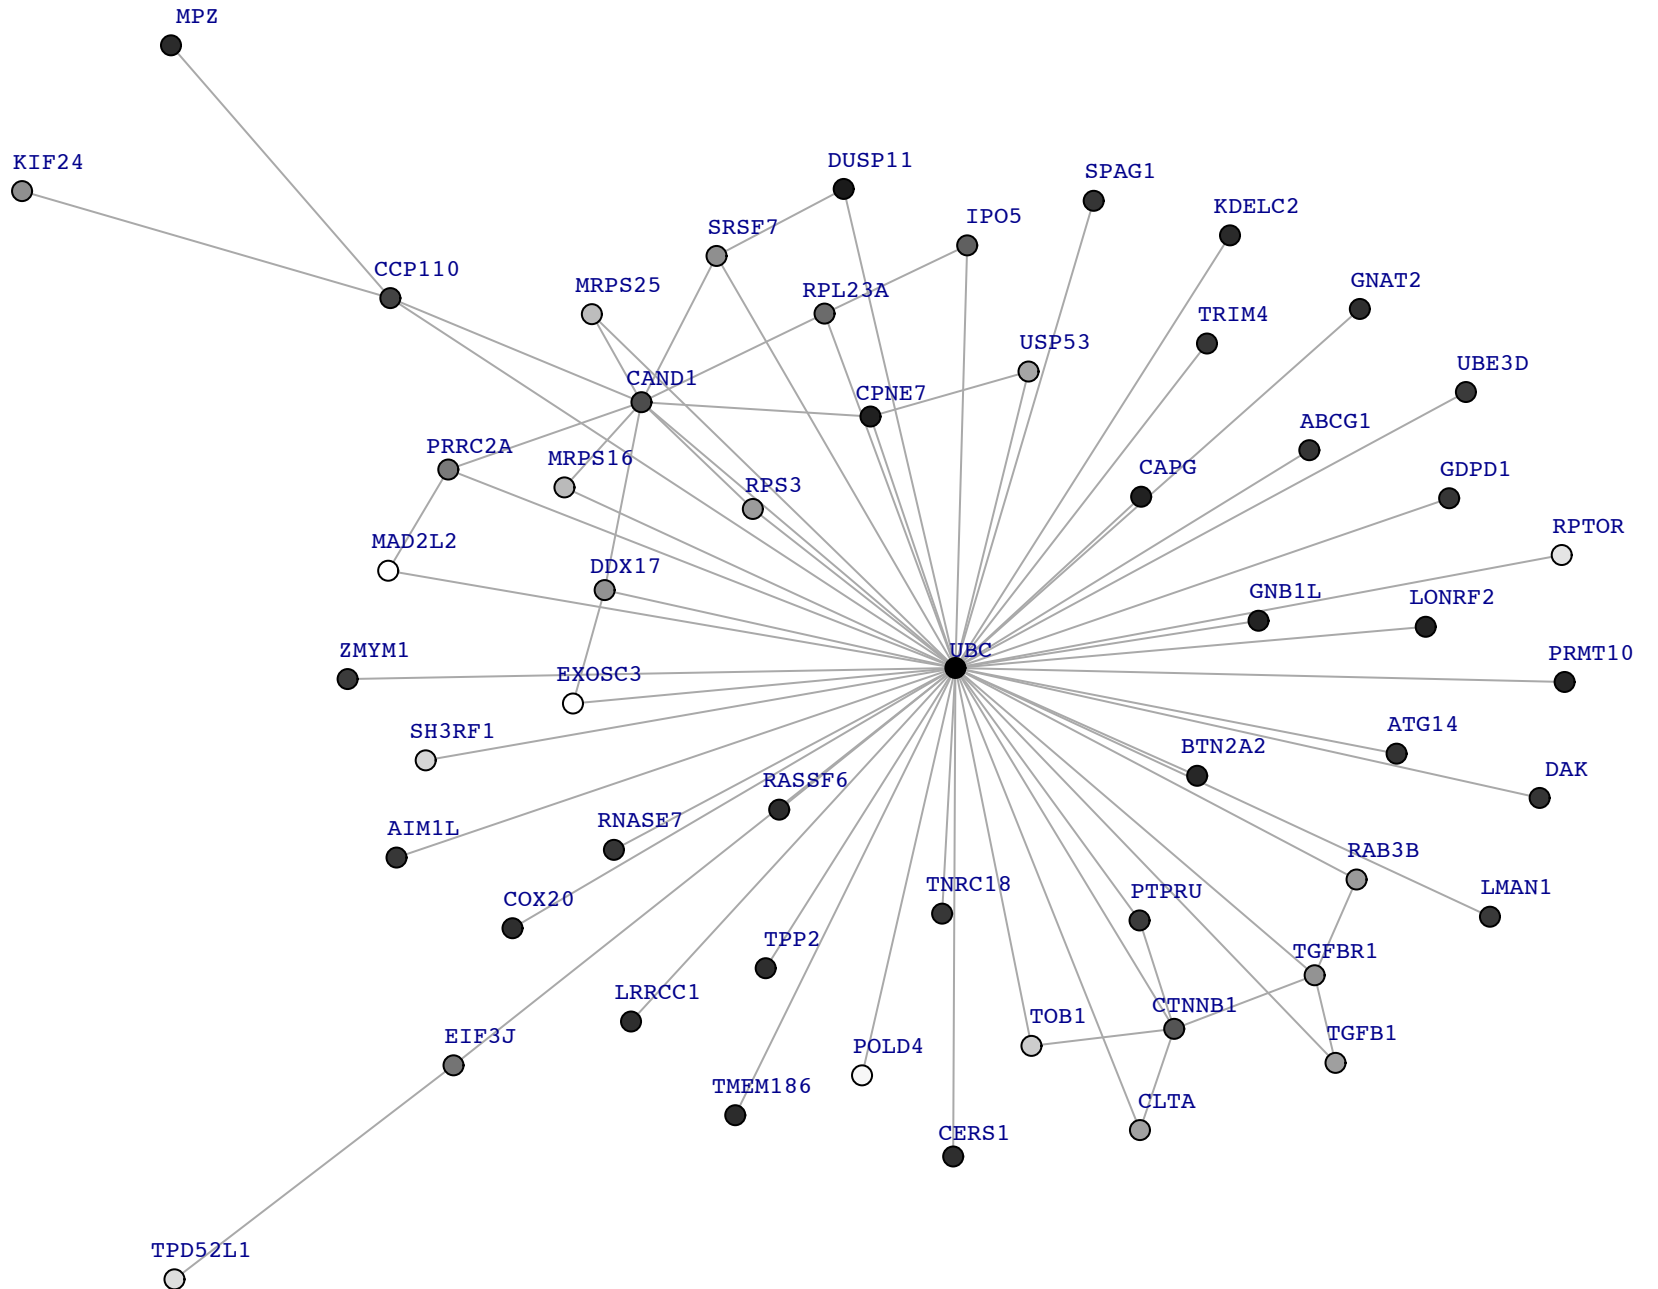









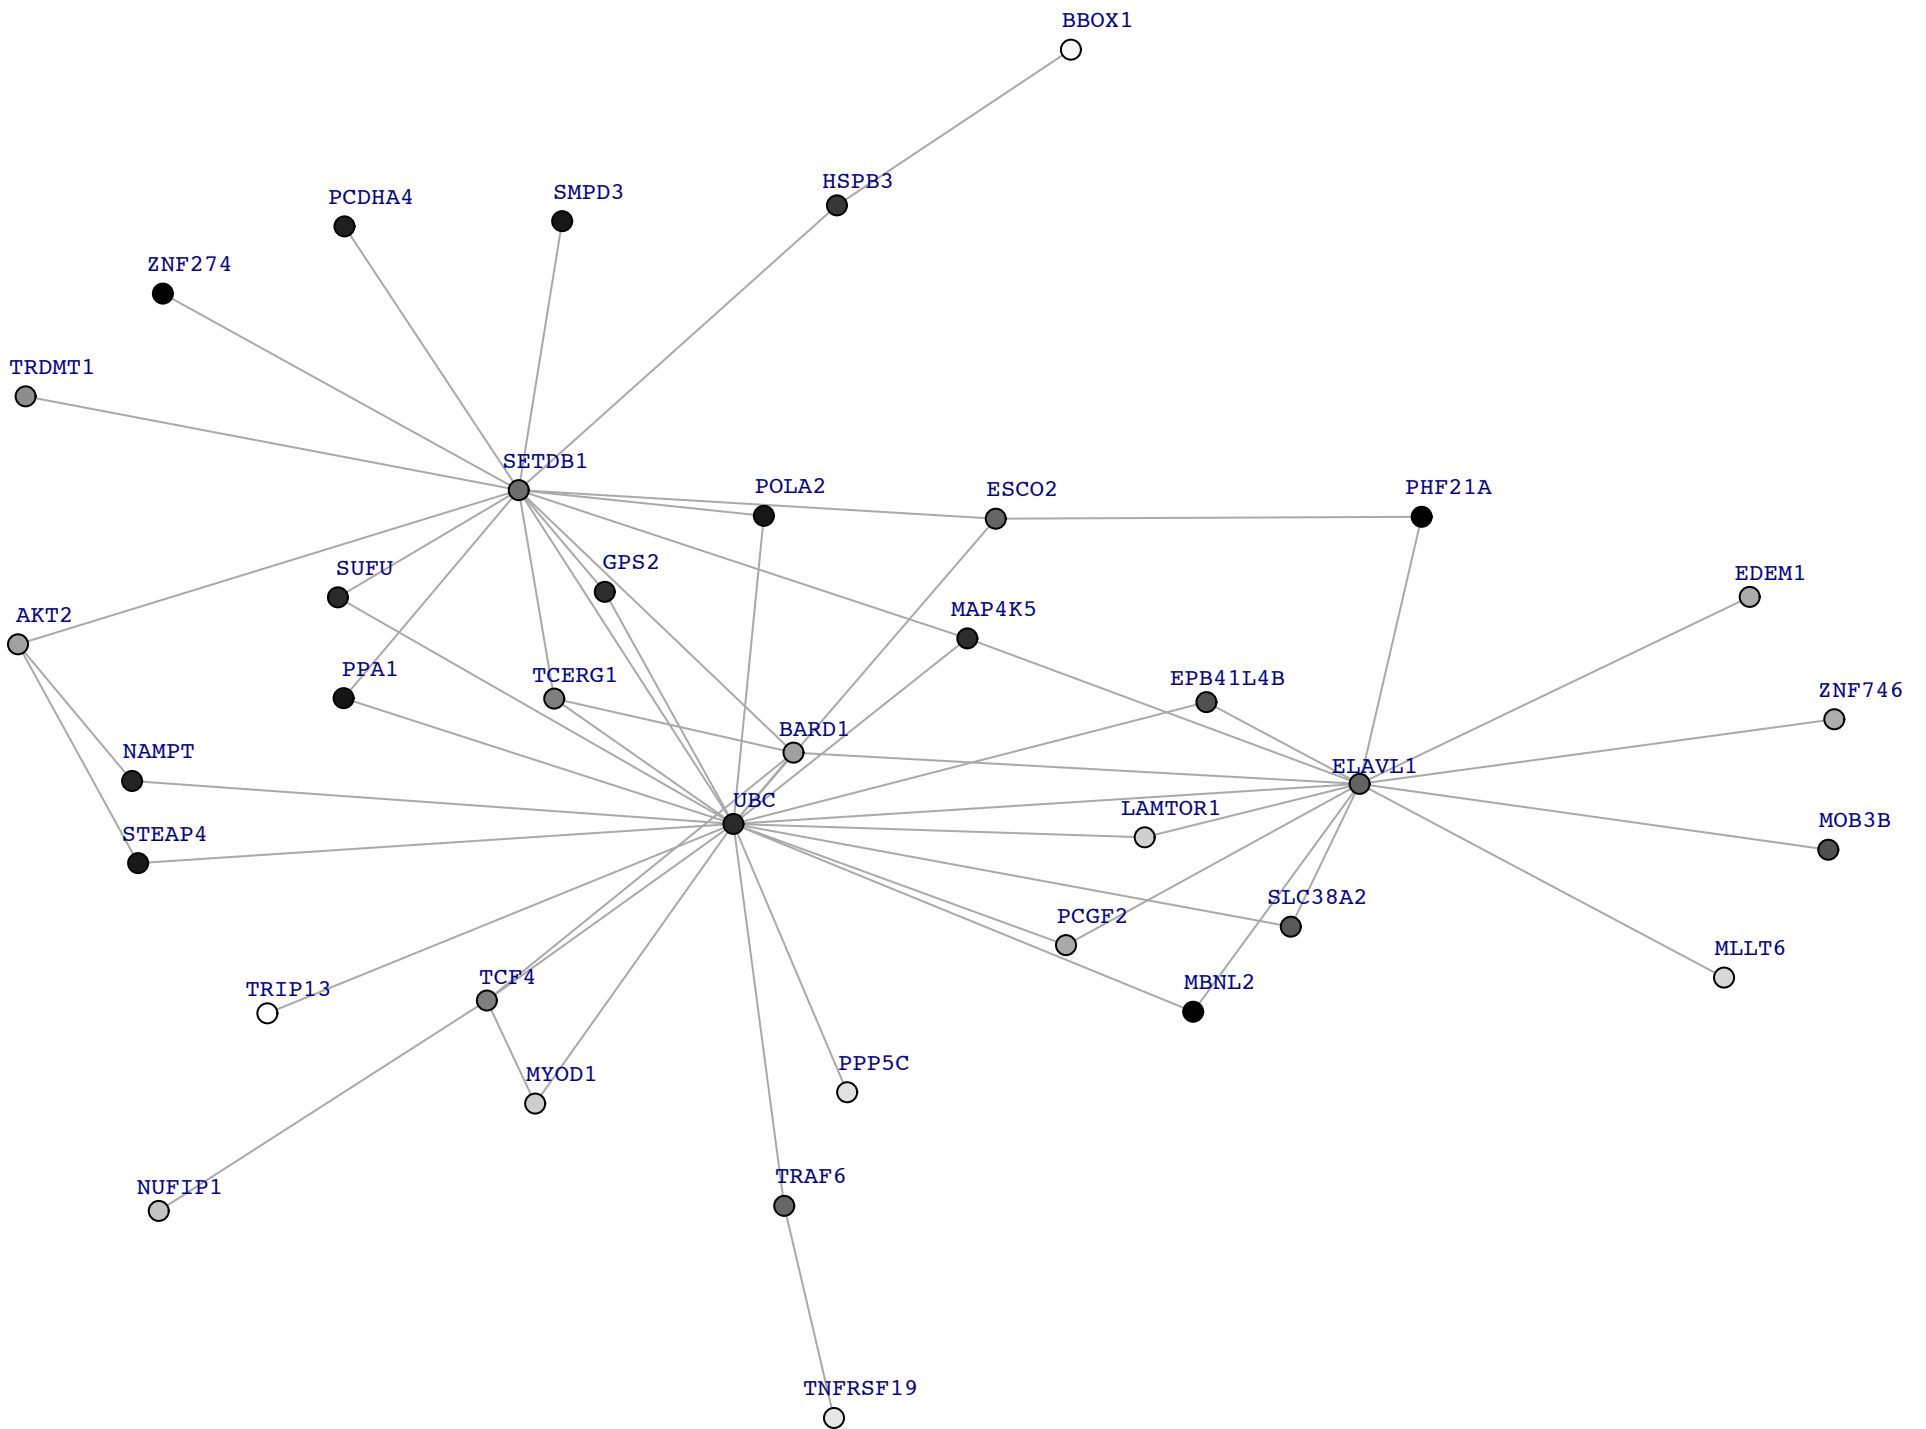



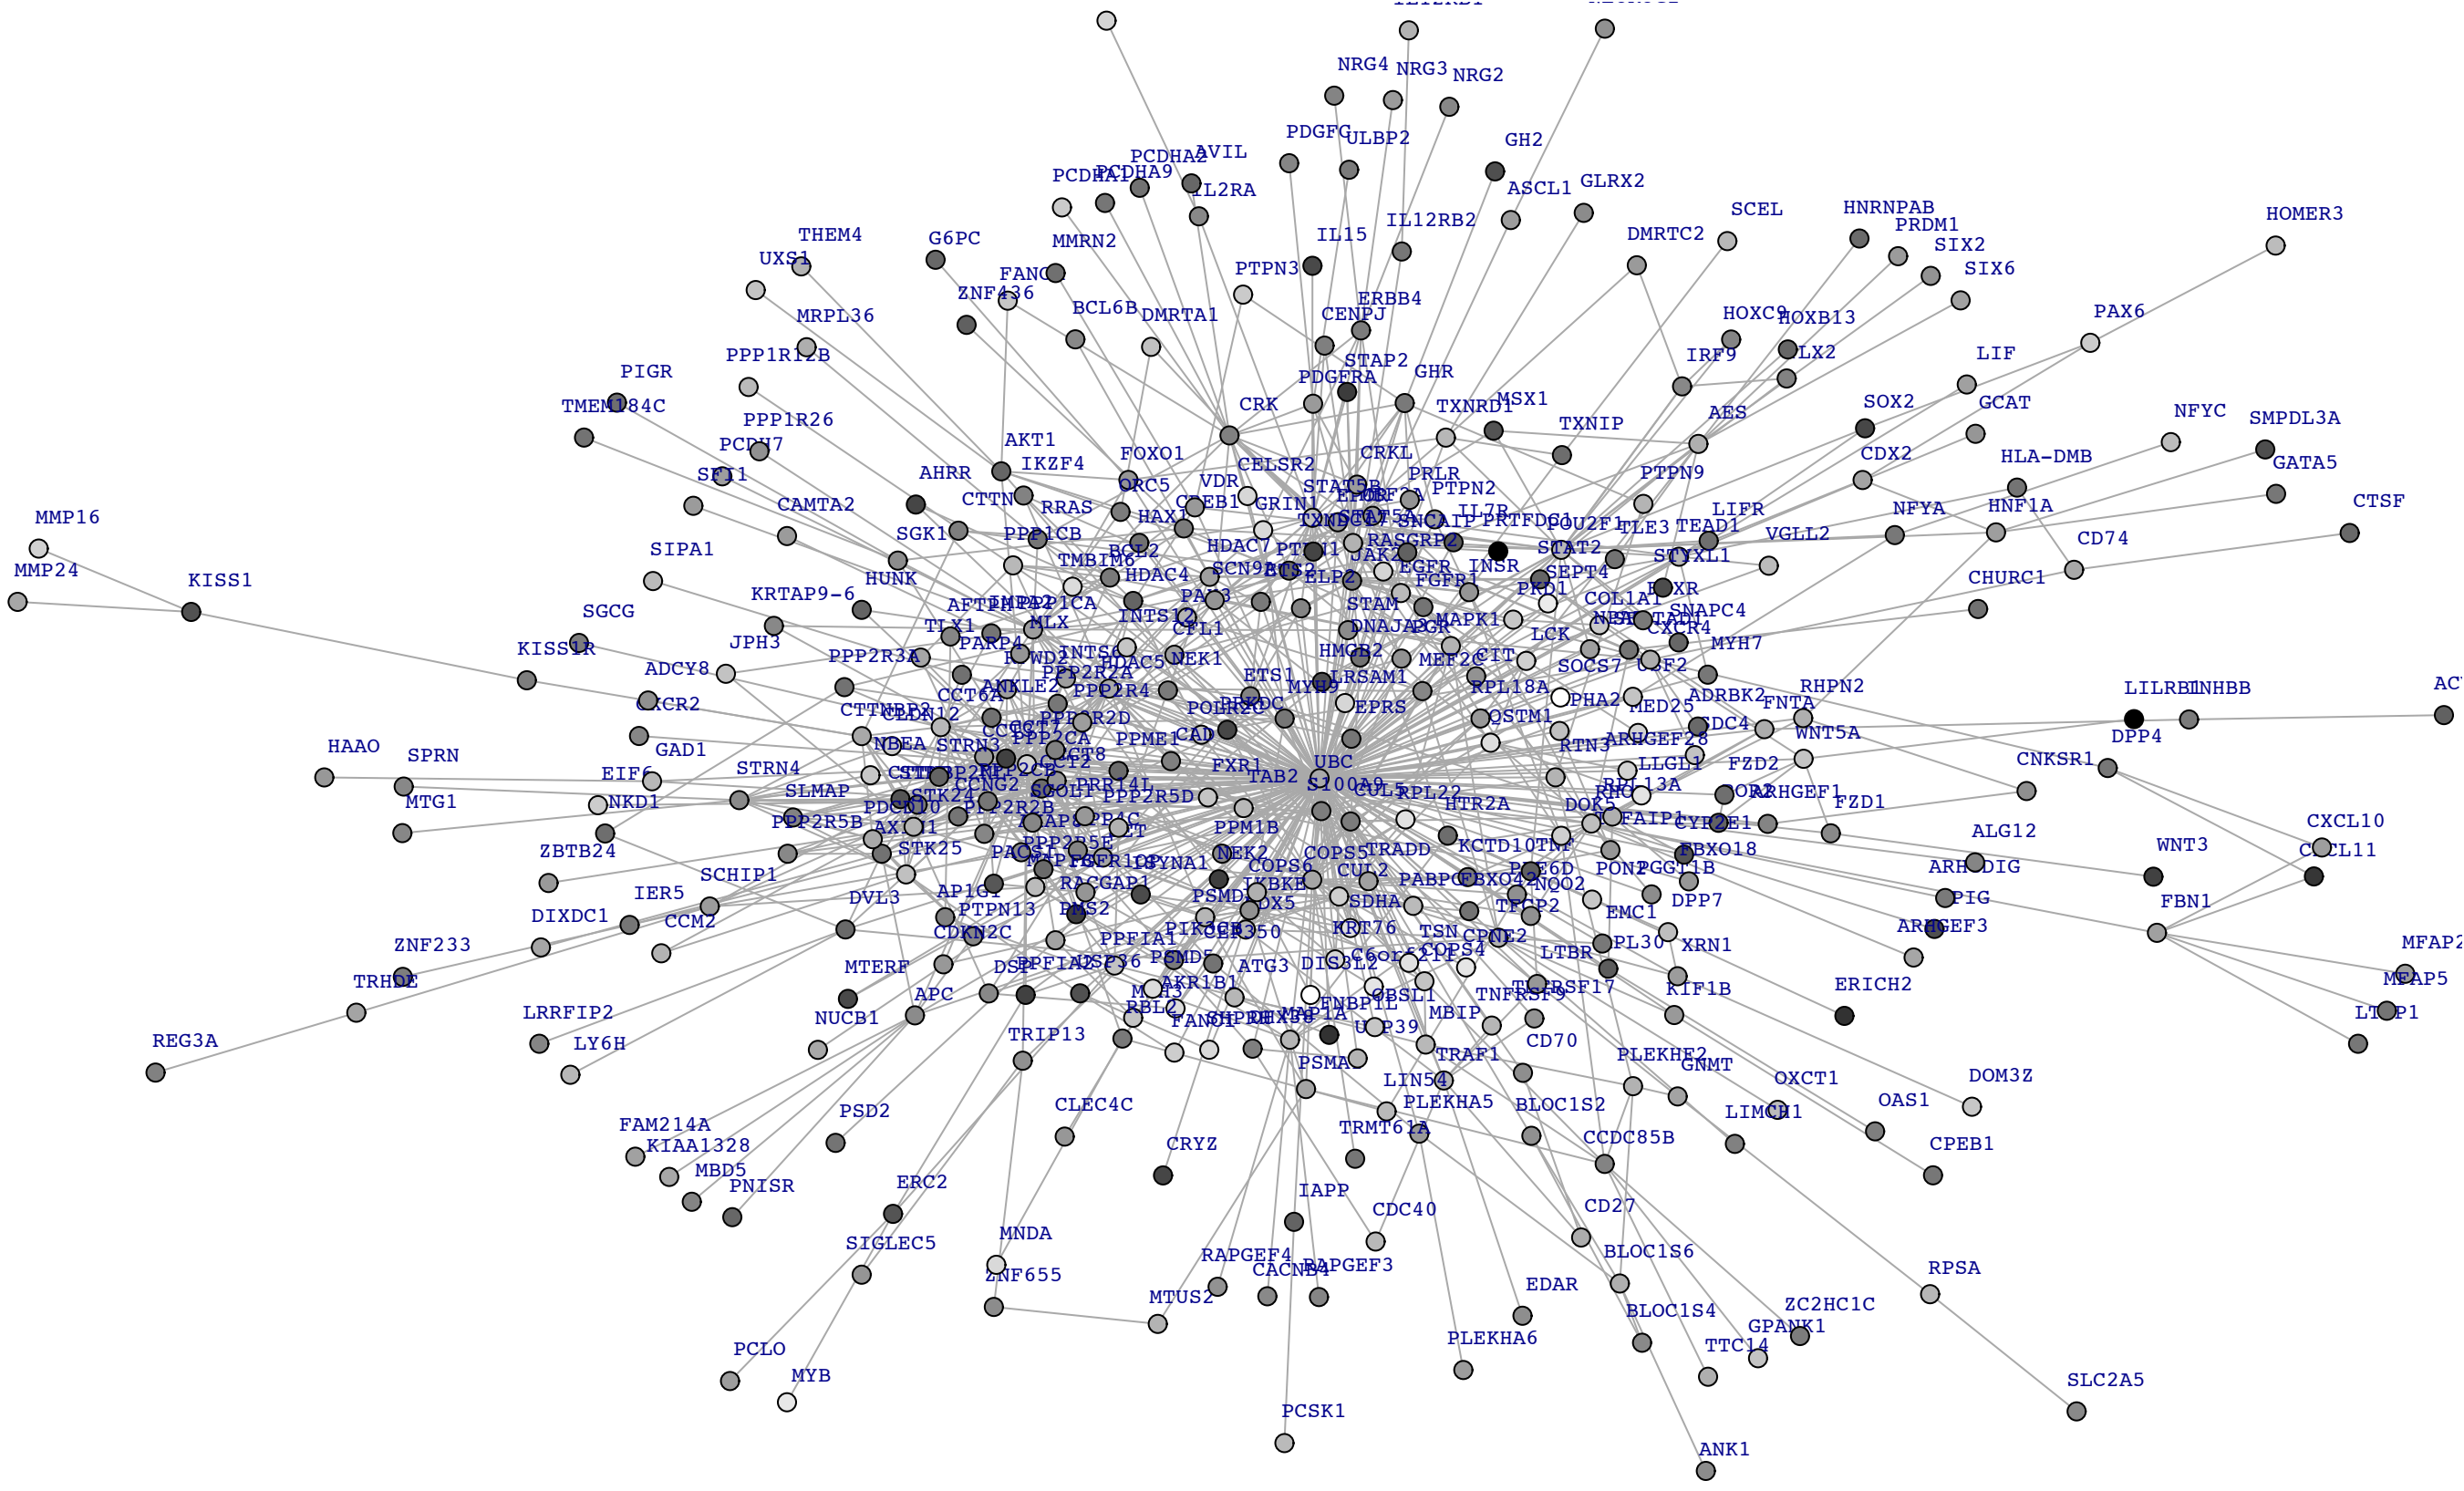

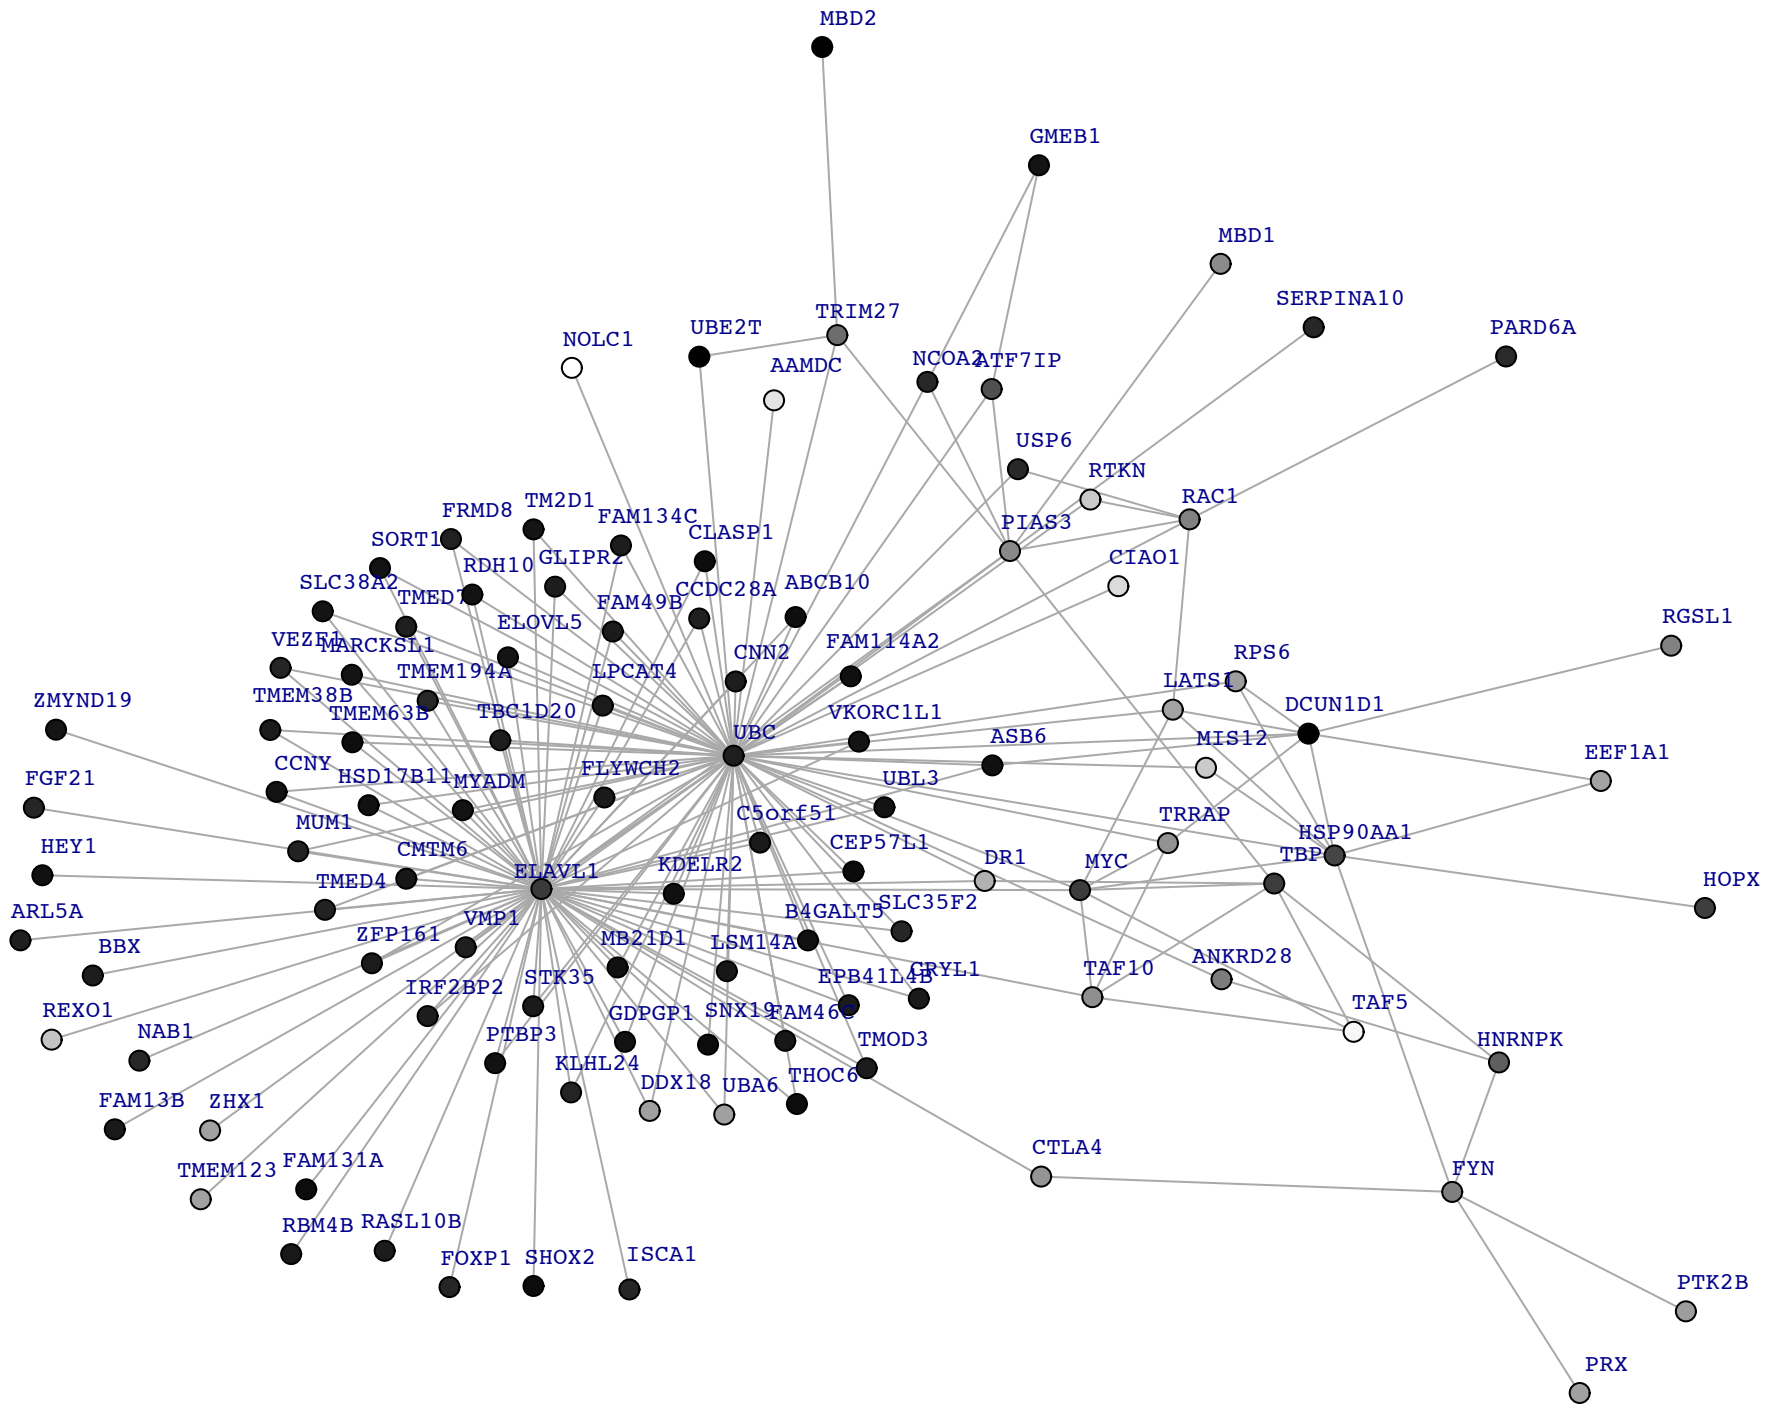







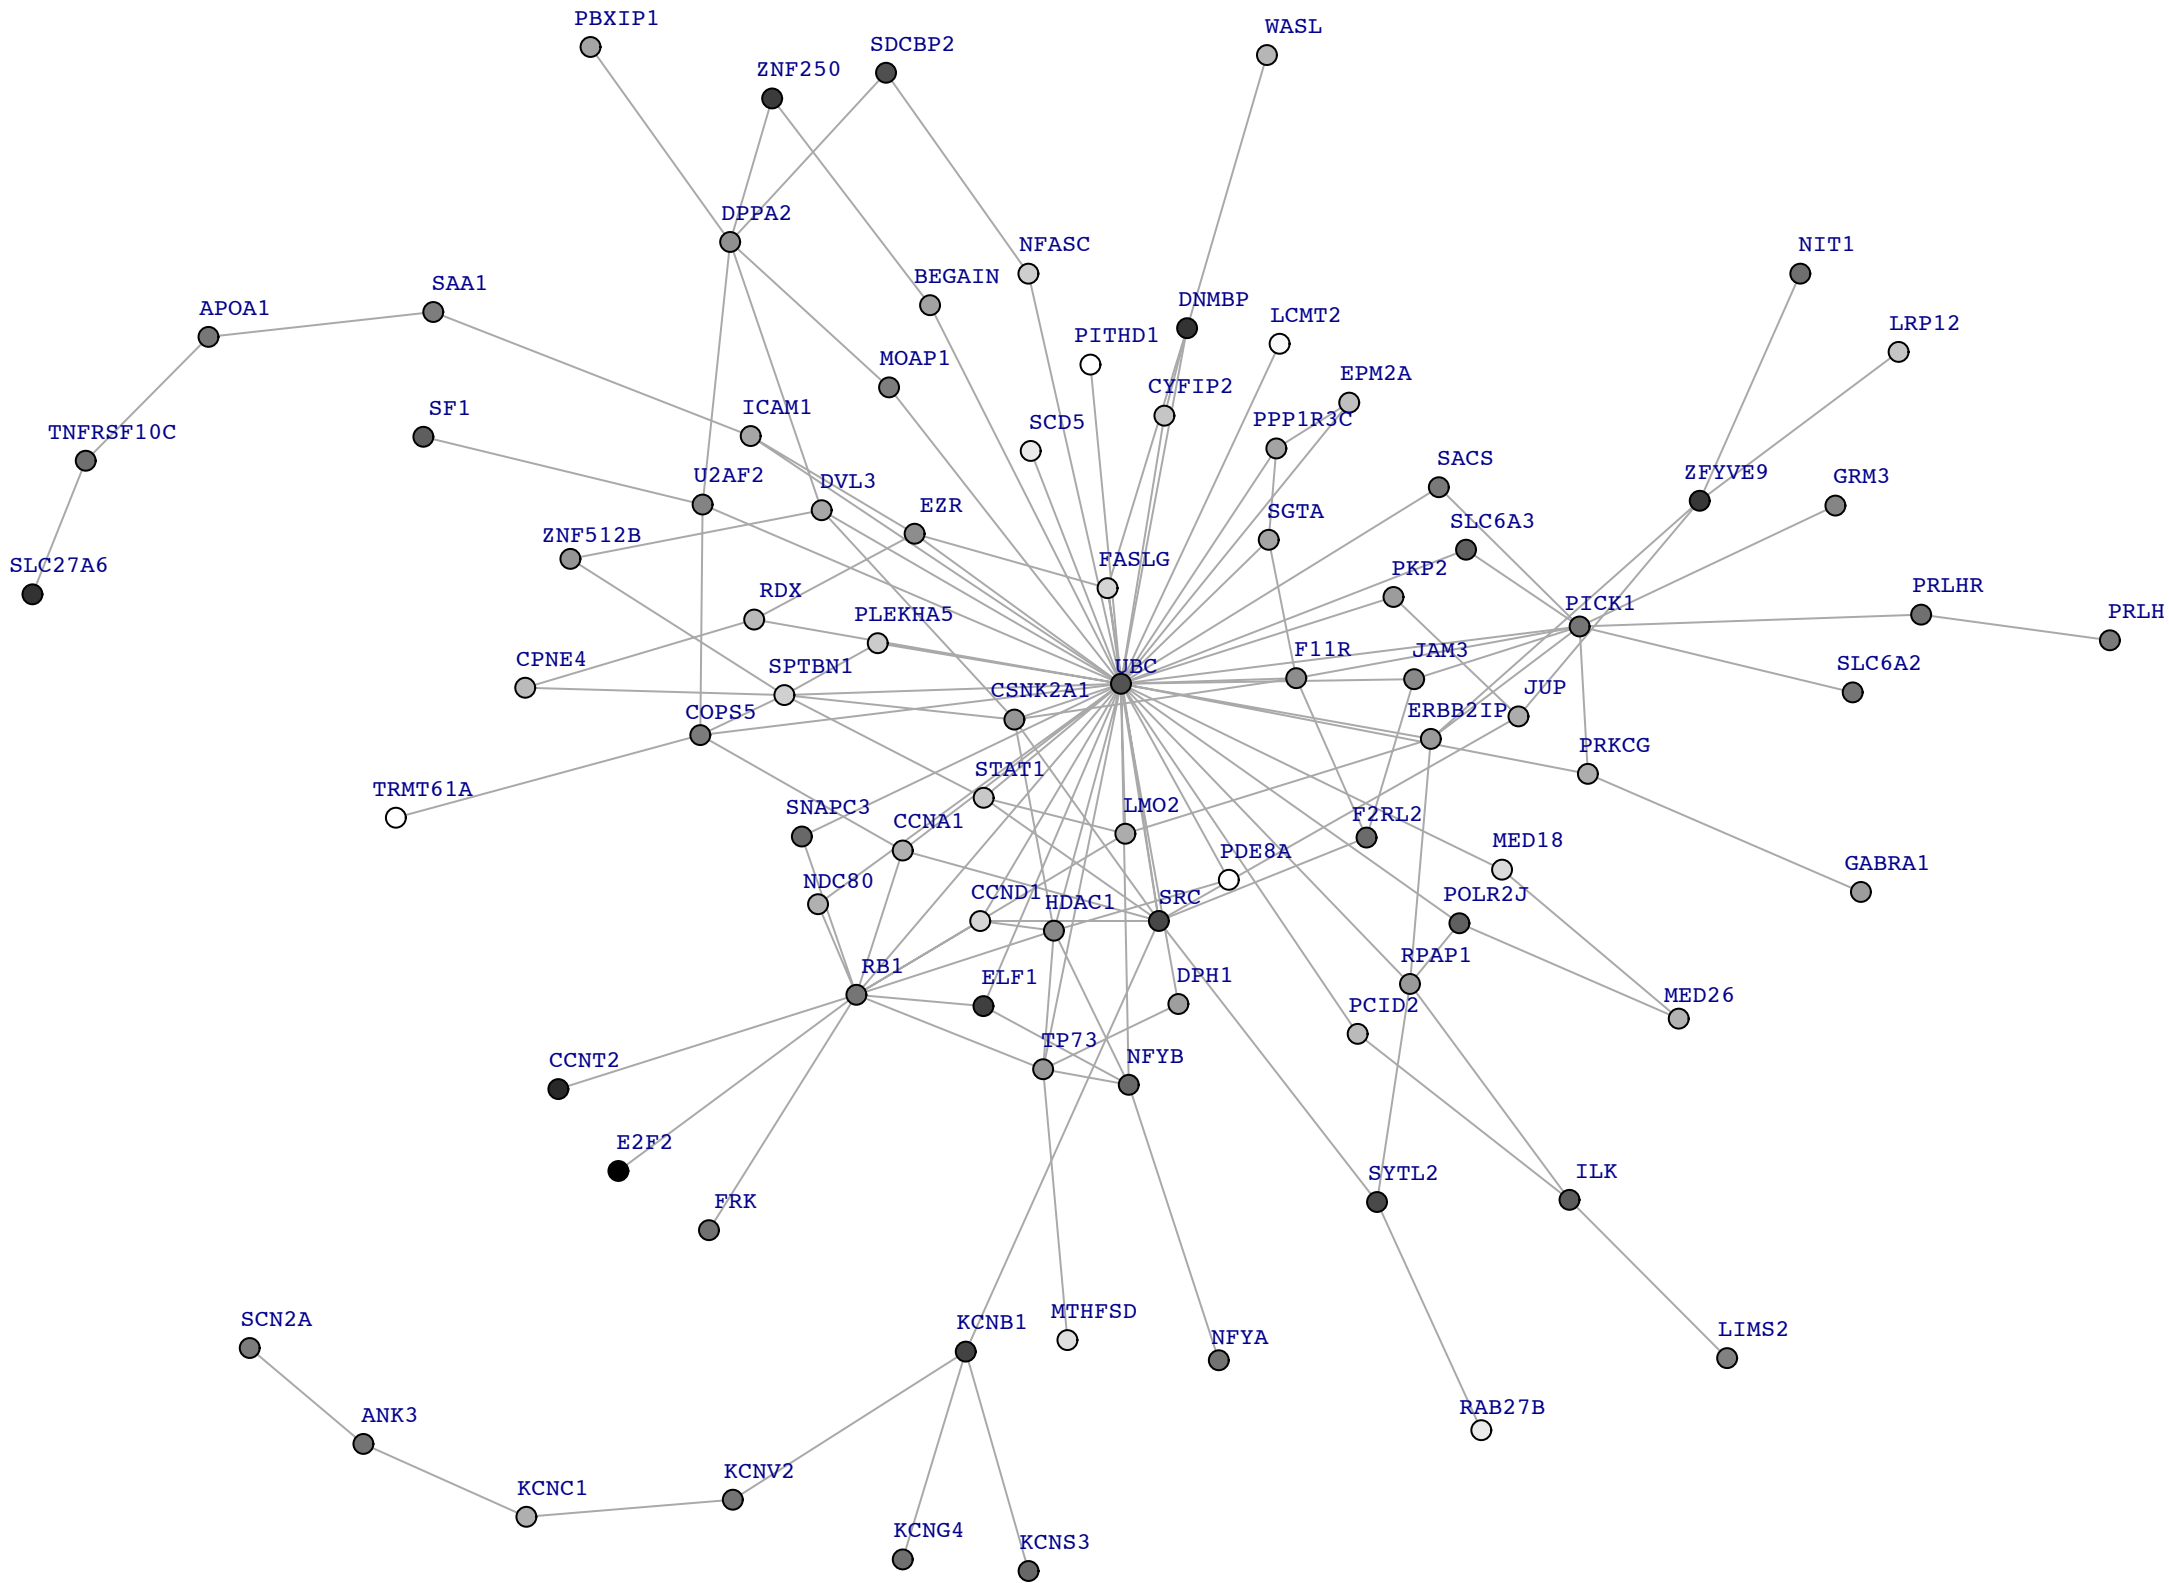

Supplement: NIHMS682290-supplement-supplement_1.pdf [file NIHMS682290-supplement-supplement_1.pdf]
